# Supplementary material
Source: Copernicus journal article supplement (doi:10.5194/hess-30-3399-2026)
Supplement: Supplementary file 1 [file hess-30-3399-2026-supplement.pdf]

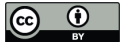

*Supplement of*

## **Comprehensive Global Assessment of 24 Gridded Precipitation Datasets Across 18 428 Catchments Using Hydrological Modeling**

**Ather Abbas et al.**

*Correspondence to:* Hylke E. Beck ([hylke.beck@kaust.edu.sa](mailto:hylke.beck@kaust.edu.sa))

The copyright of individual parts of the supplement might differ from the article licence.

## Supplementary Contents

|                                                                               |           |
|-------------------------------------------------------------------------------|-----------|
| <b>S1 Performance Comparison Across Köppen-Geiger Climate Zones</b>           | <b>2</b>  |
| <b>S2 Spatial Maps of Calibration Performance for <math>P</math> Datasets</b> | <b>4</b>  |
| <b>S3 Performance Variation Across Streamflow Data Sources</b>                | <b>28</b> |
| <b>S4 Impact of Rain Gauge Density on Model Performance</b>                   | <b>30</b> |
| <b>S5 Scenario Analysis of Calibration Strategies</b>                         | <b>31</b> |
| <b>S6 Differences in Mean Annual Precipitation</b>                            | <b>35</b> |
| <b>S7 Performance Variation with Altitude</b>                                 | <b>48</b> |

# S1 Performance Comparison Across Köppen-Geiger Climate Zones

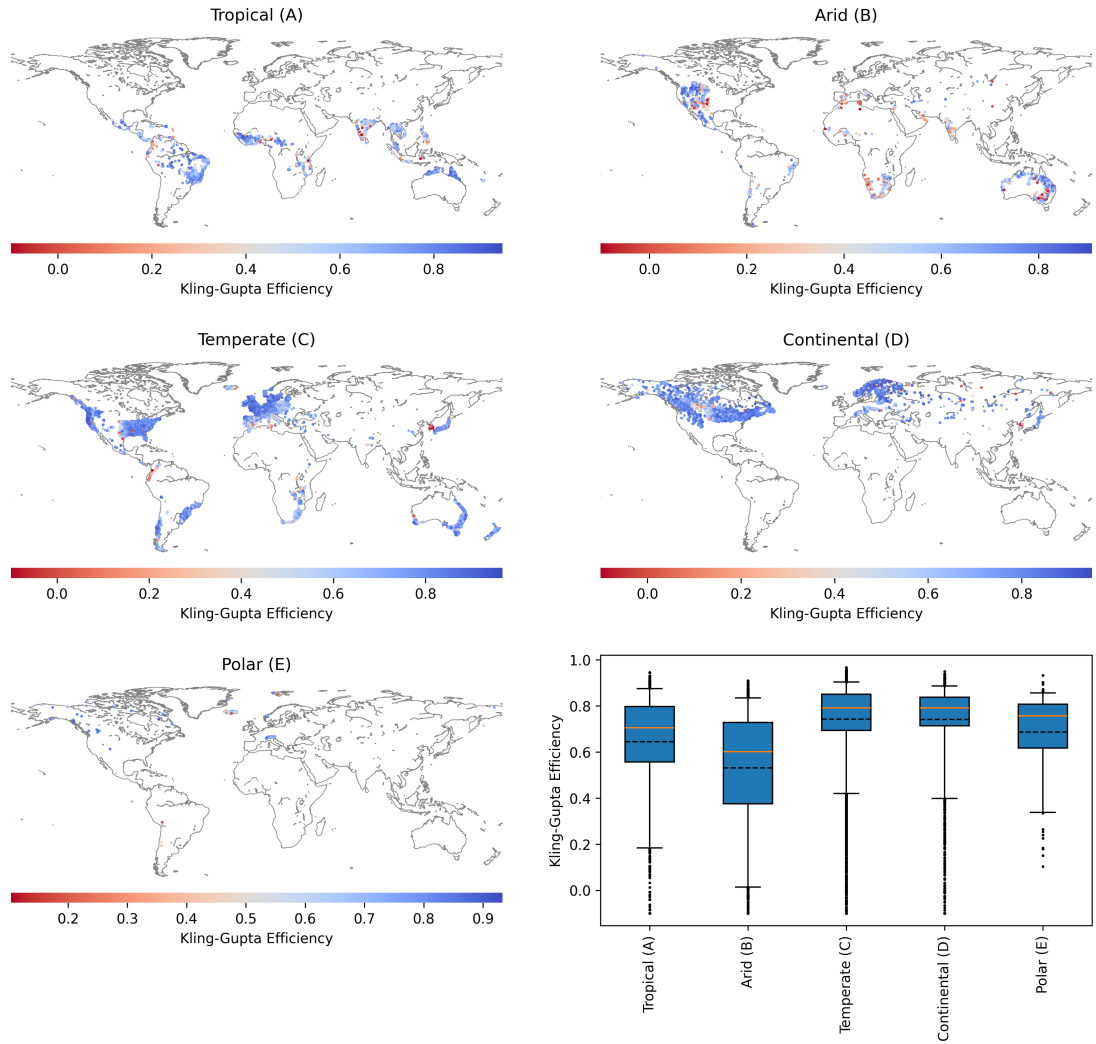

Figure S1: Spatial maps and distribution of Kling-Gupta Efficiency for MSWEP V2.8 dataset.

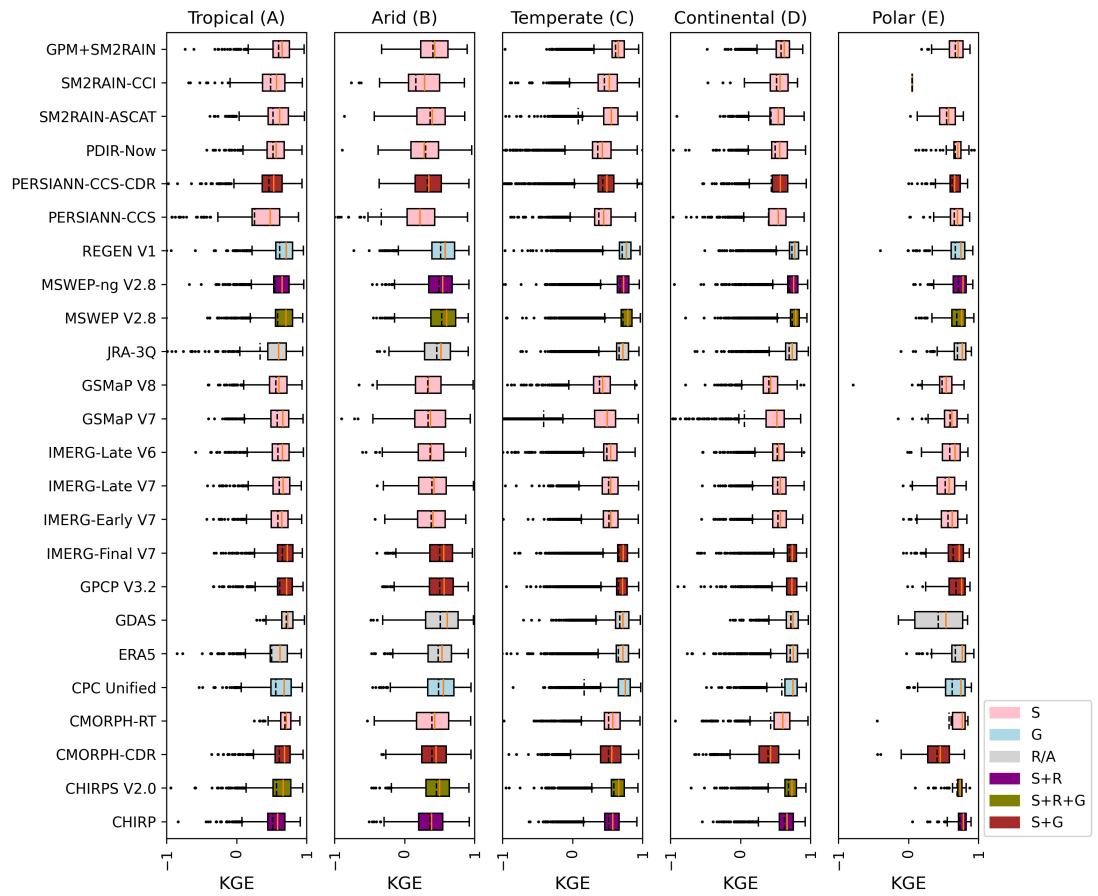

Figure S2: Performance of 24 P datasets in major Köppen-Geiger climate zones.

## S2 Spatial Maps of Calibration Performance for $P$ Datasets

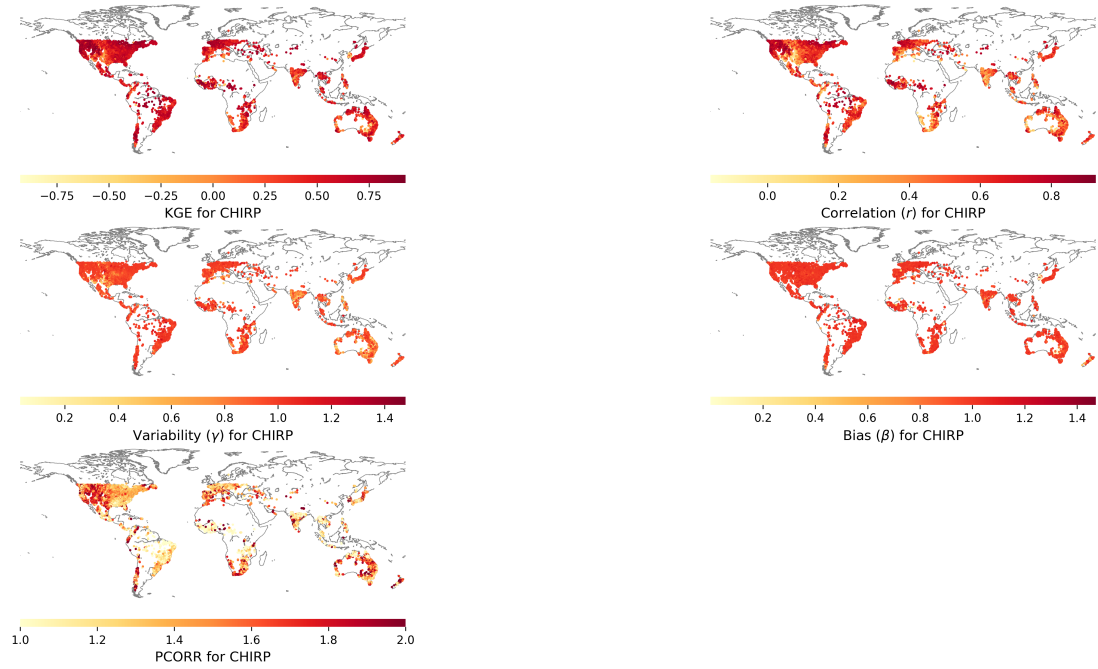

Figure S3: Calibration performance (KGE, correlation, variability, and bias) and PCORR values for CHIRP.

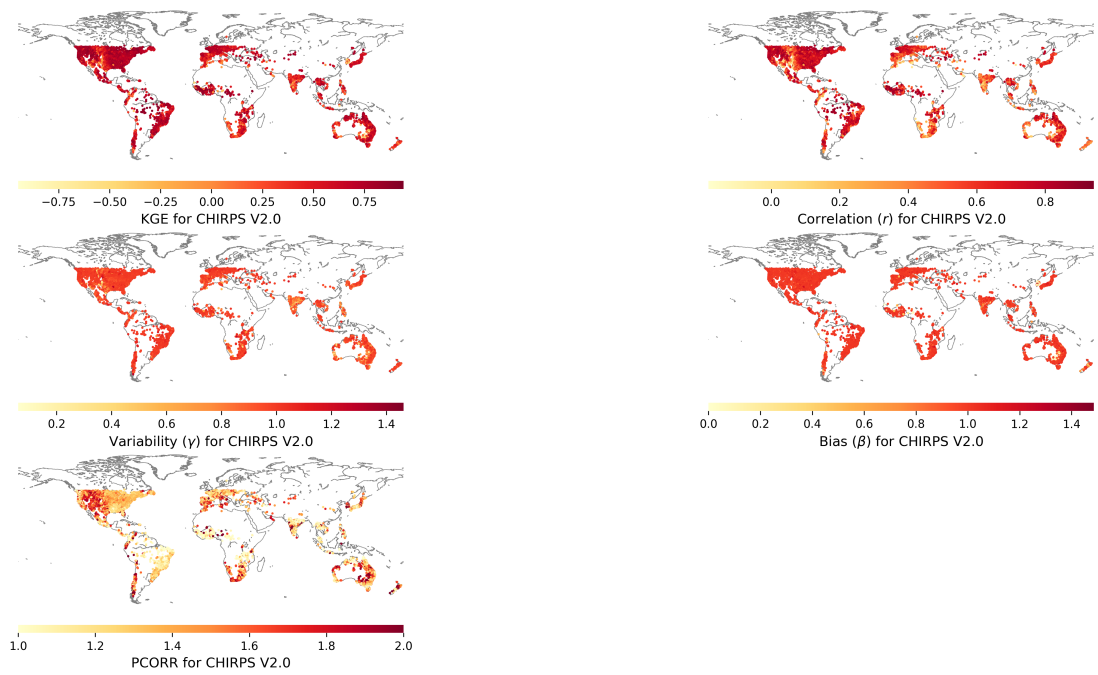

Figure S4: Calibration performance (KGE, correlation, variability, and bias) and PCORR values for CHIRPS V2.0.

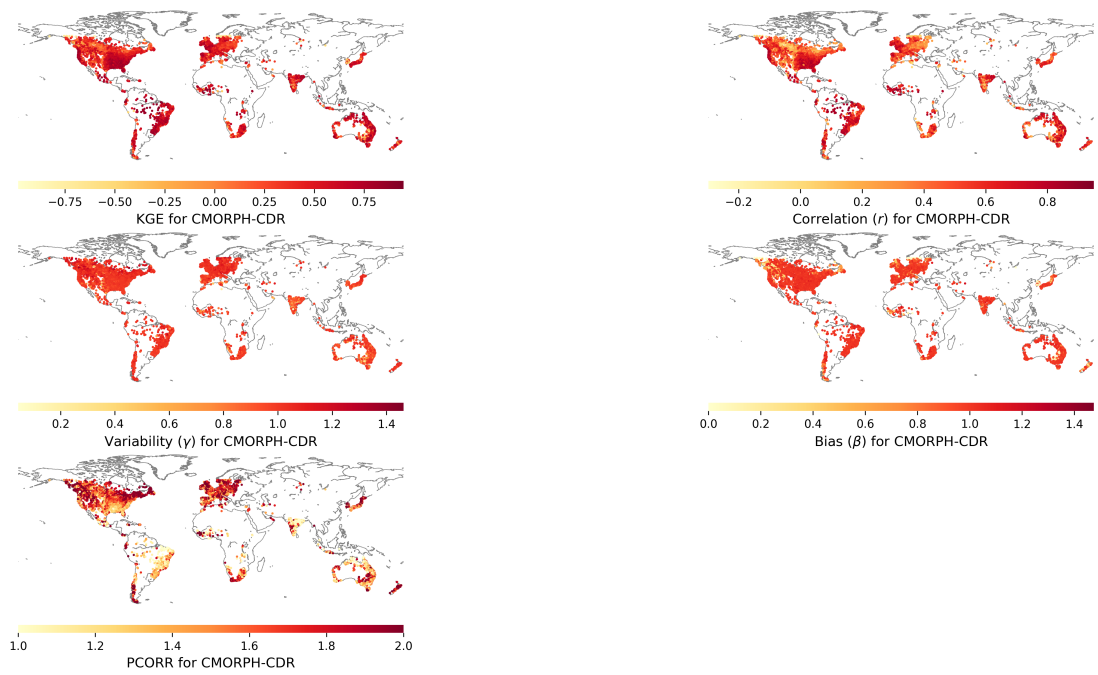

Figure S5: Calibration performance (KGE, correlation, variability, and bias) and PCORR values for CMORPH-CDR.

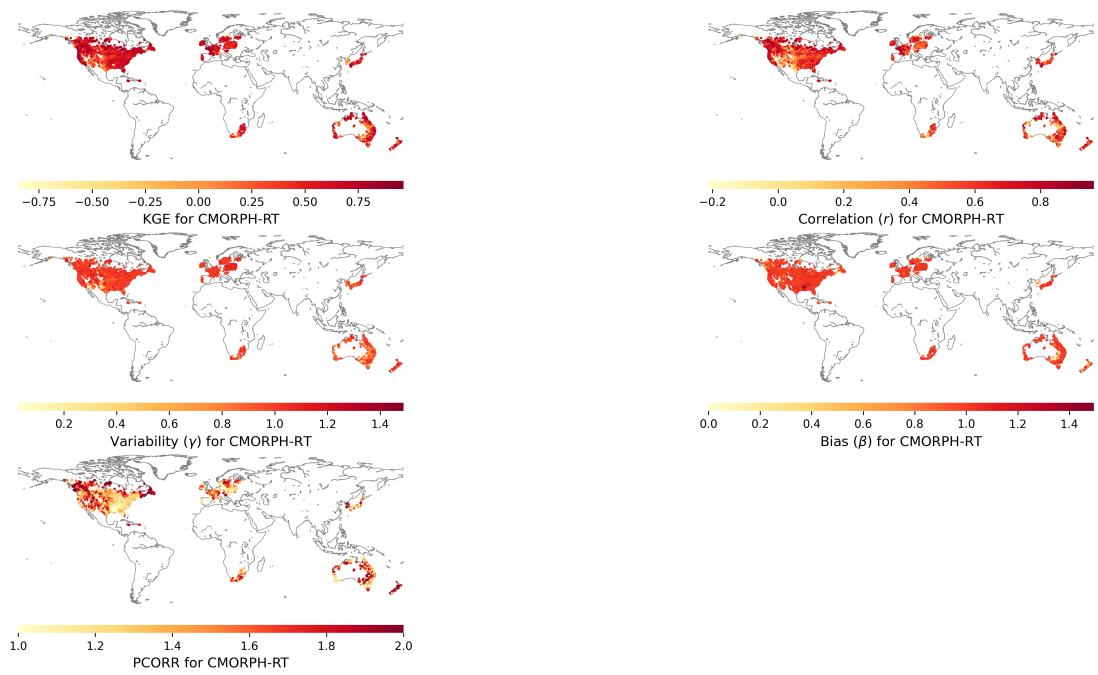

Figure S6: Calibration performance (KGE, correlation, variability, and bias) and PCORR values for CMORPH-RT.

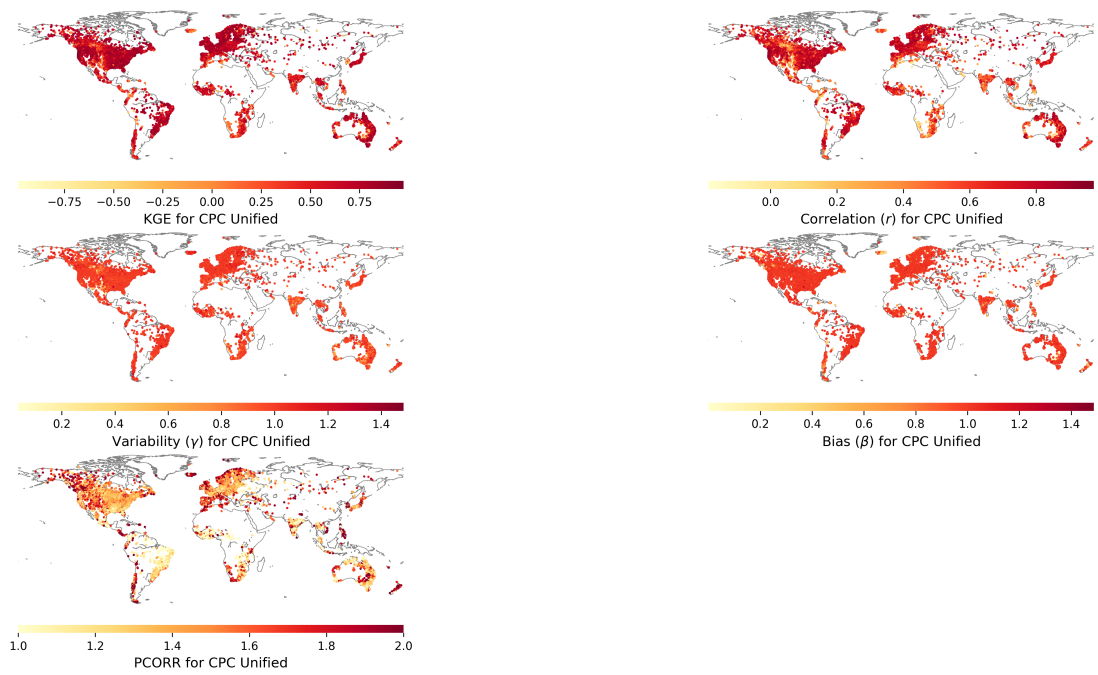

Figure S7: Calibration performance (KGE, correlation, variability, and bias) and PCORR values for CPC Unified.

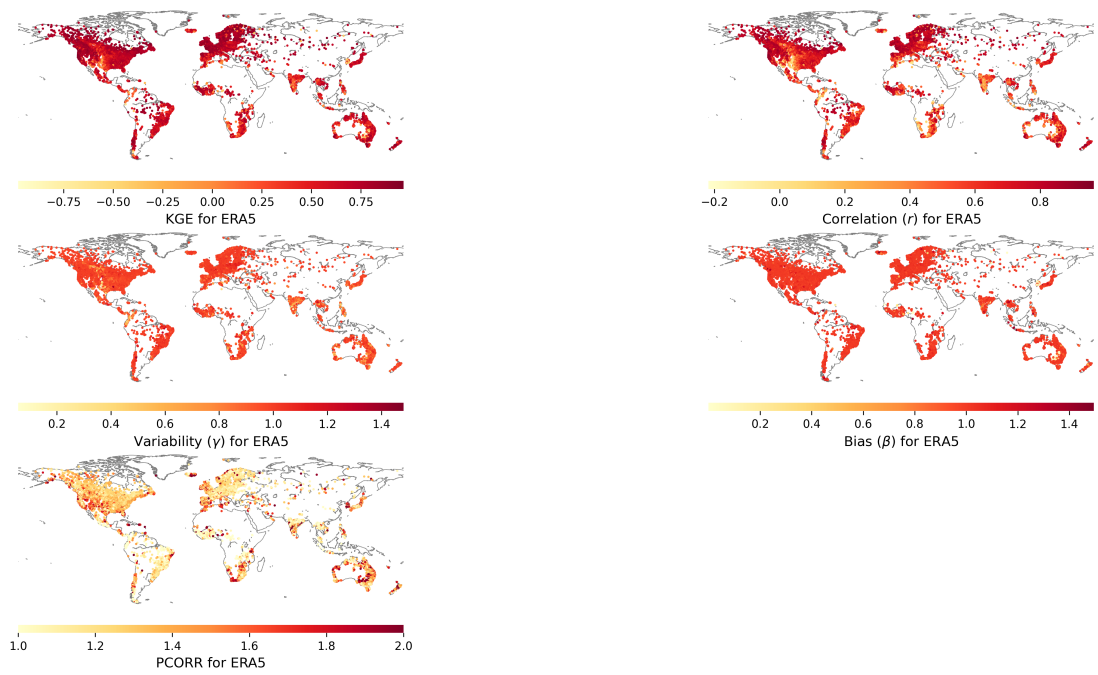

Figure S8: Calibration performance (KGE, correlation, variability, and bias) and PCORR values for ERA5.

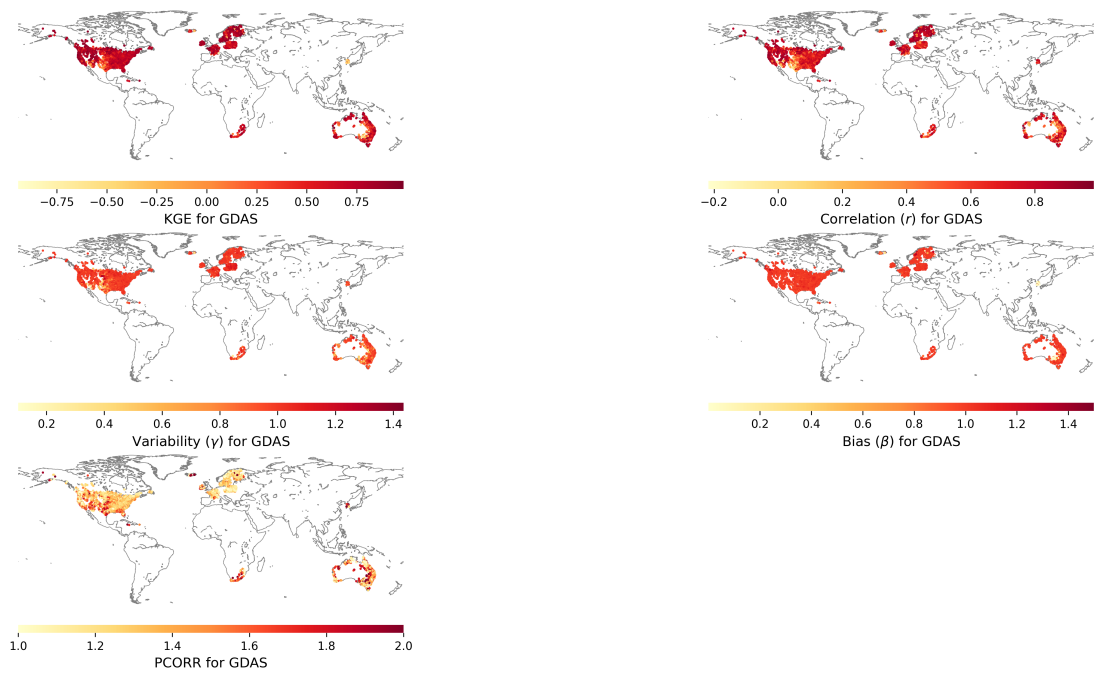

Figure S9: Calibration performance (KGE, correlation, variability, and bias) and PCORR values for GDAS.

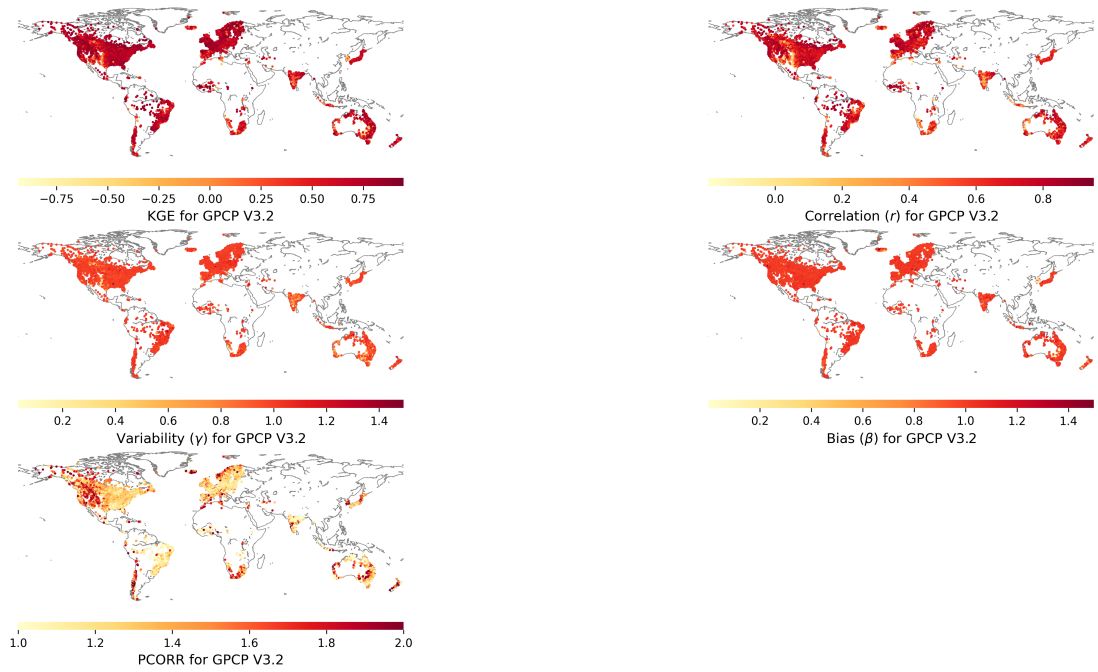

Figure S10: Calibration performance (KGE, correlation, variability, and bias) and PCORR values for GPCP V3.2.

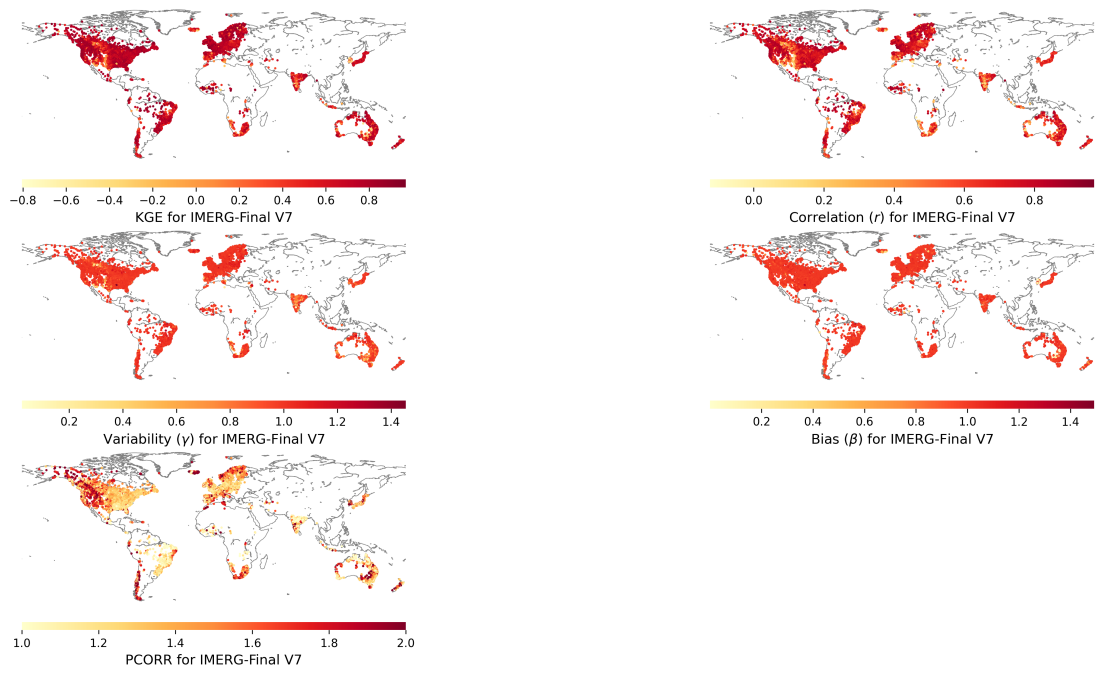

Figure S11: Calibration performance (KGE, correlation, variability, and bias) and PCORR values IMERG-Final V7.

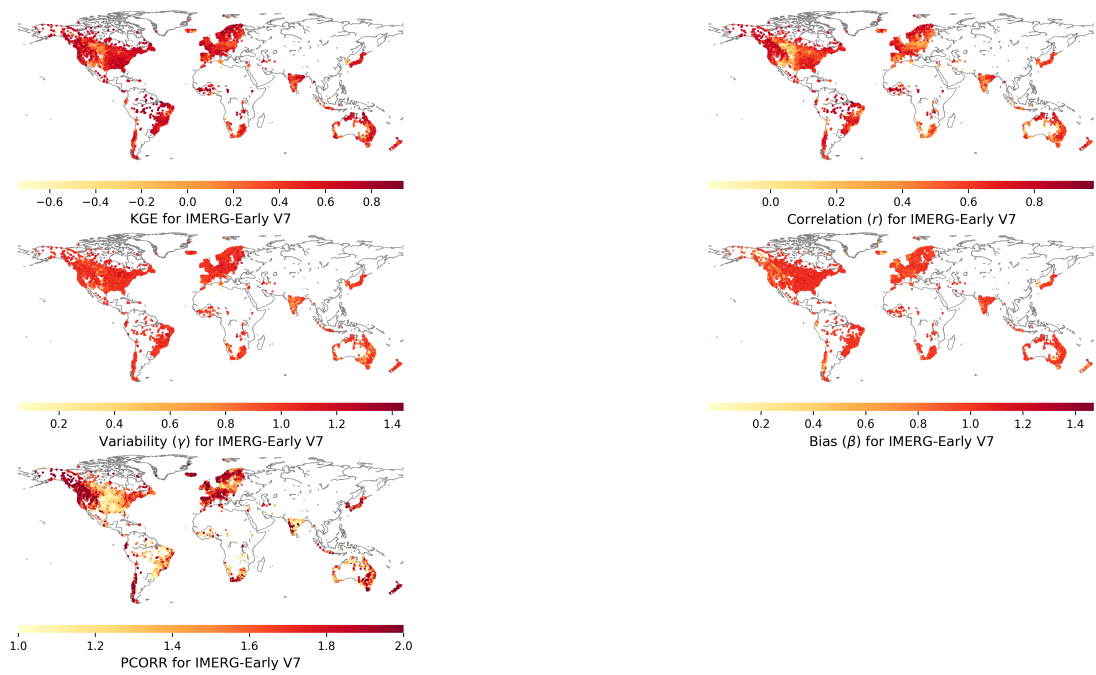

Figure S12: Calibration performance (KGE, correlation, variability, and bias) and PCORR values for IMERG-Early V7.

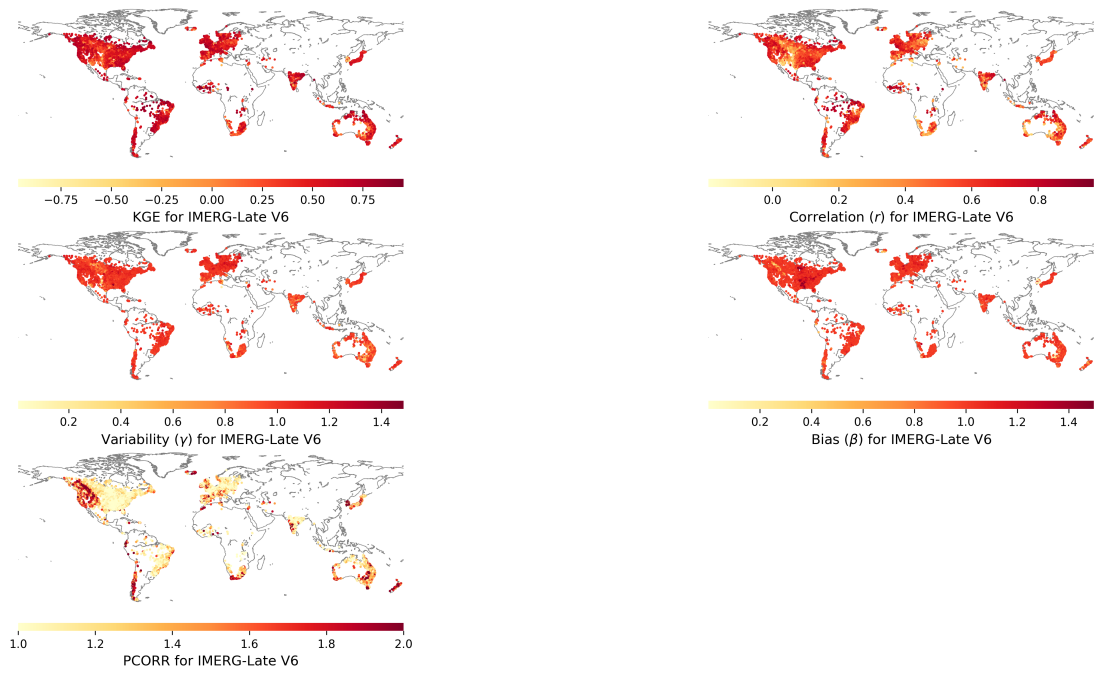

Figure S13: Calibration performance (KGE, correlation, variability, and bias) and PCORR values for IMERG-Late V6.

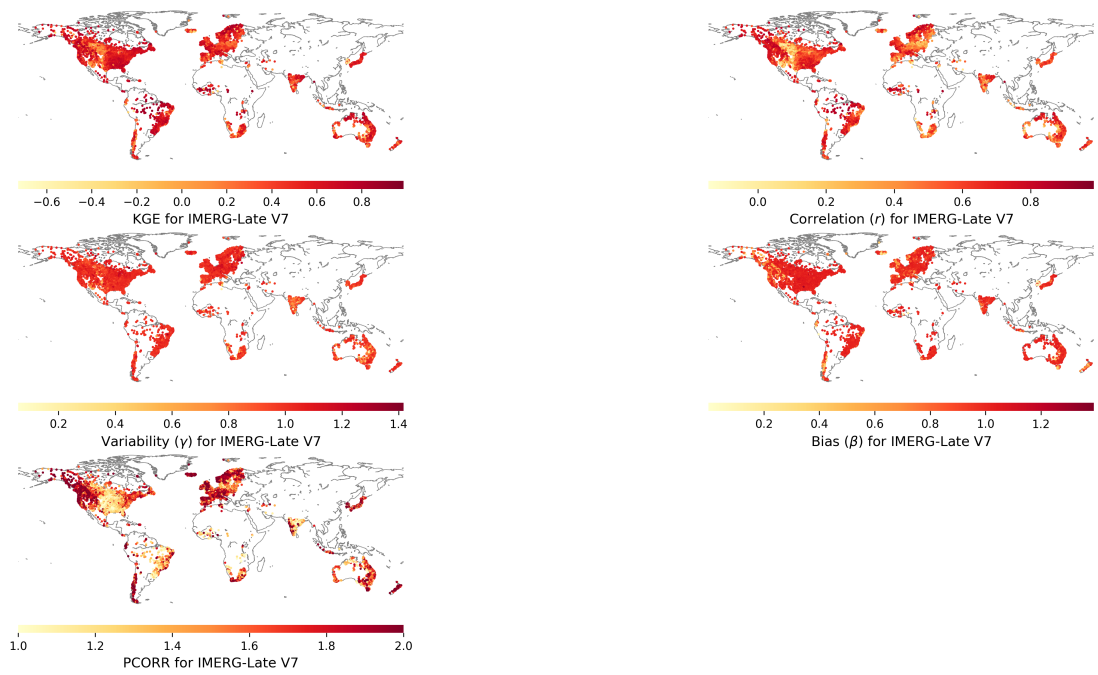

Figure S14: Calibration performance (KGE, correlation, variability, and bias) and PCORR values for IMERG-Late V7.

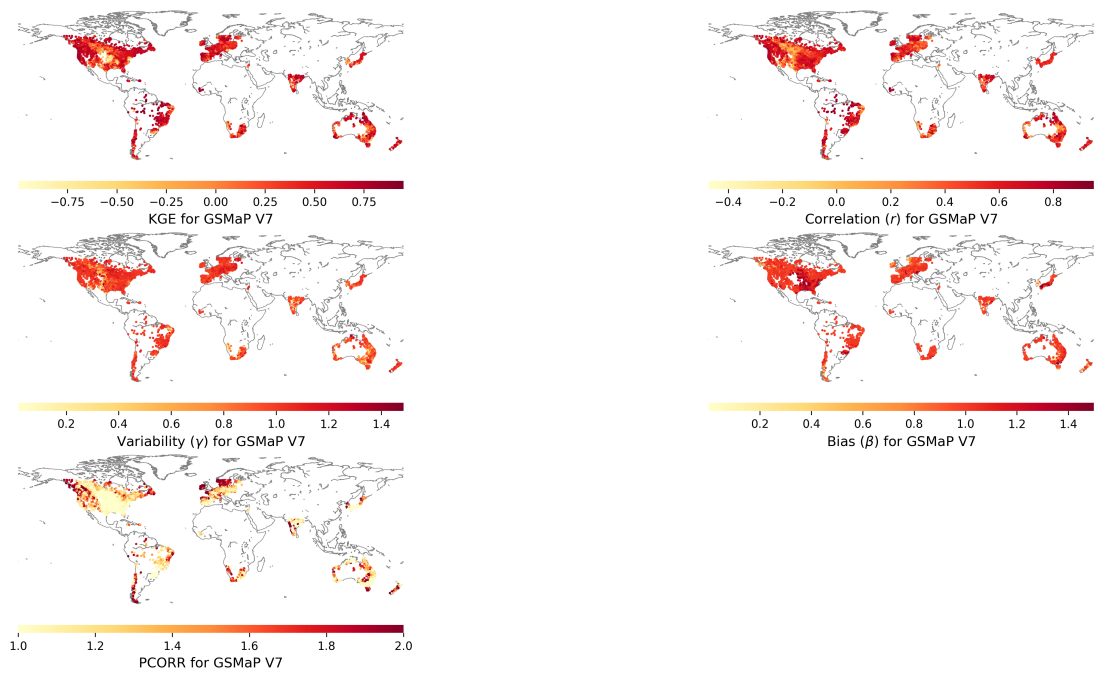

Figure S15: Calibration performance (KGE, correlation, variability, and bias) and PCORR values achieved for GSMaP V7.

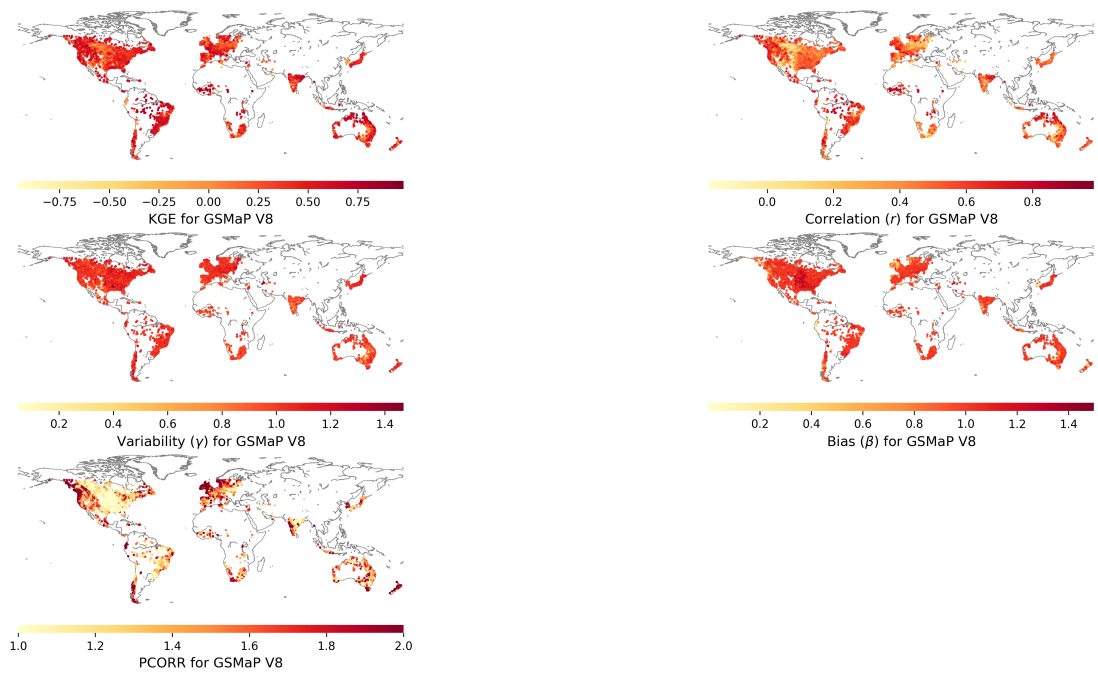

Figure S16: Calibration performance (KGE, correlation, variability, and bias) and PCORR values for GSMaP V8.

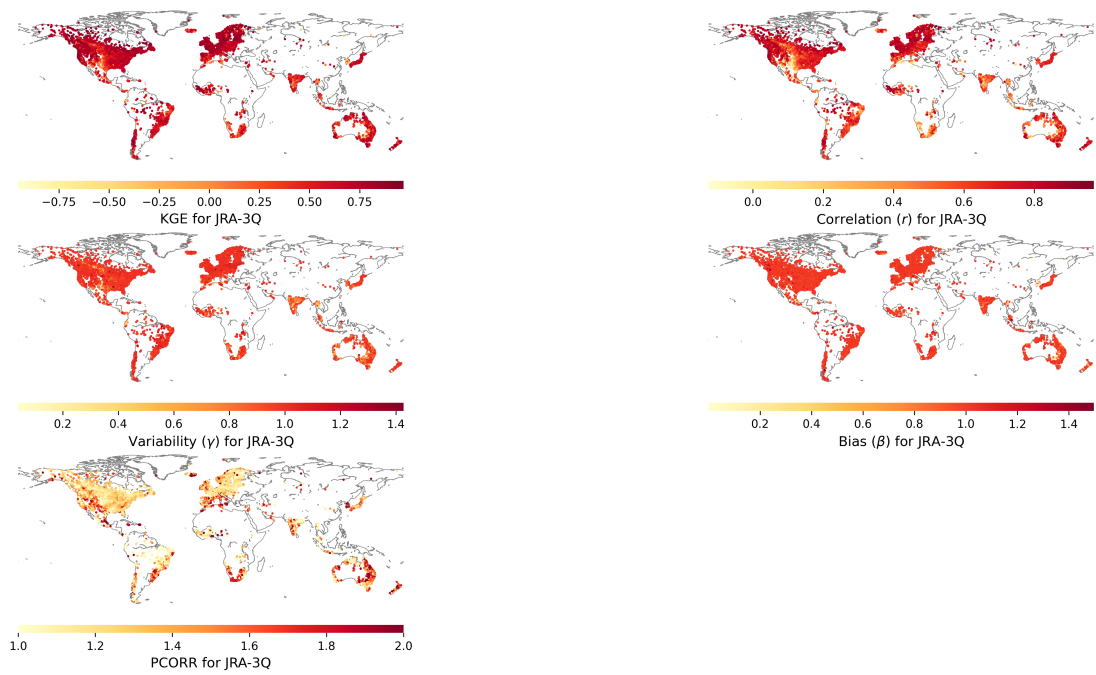

Figure S17: Calibration performance (KGE, correlation, variability, and bias) and PCORR values for JRA-3Q.

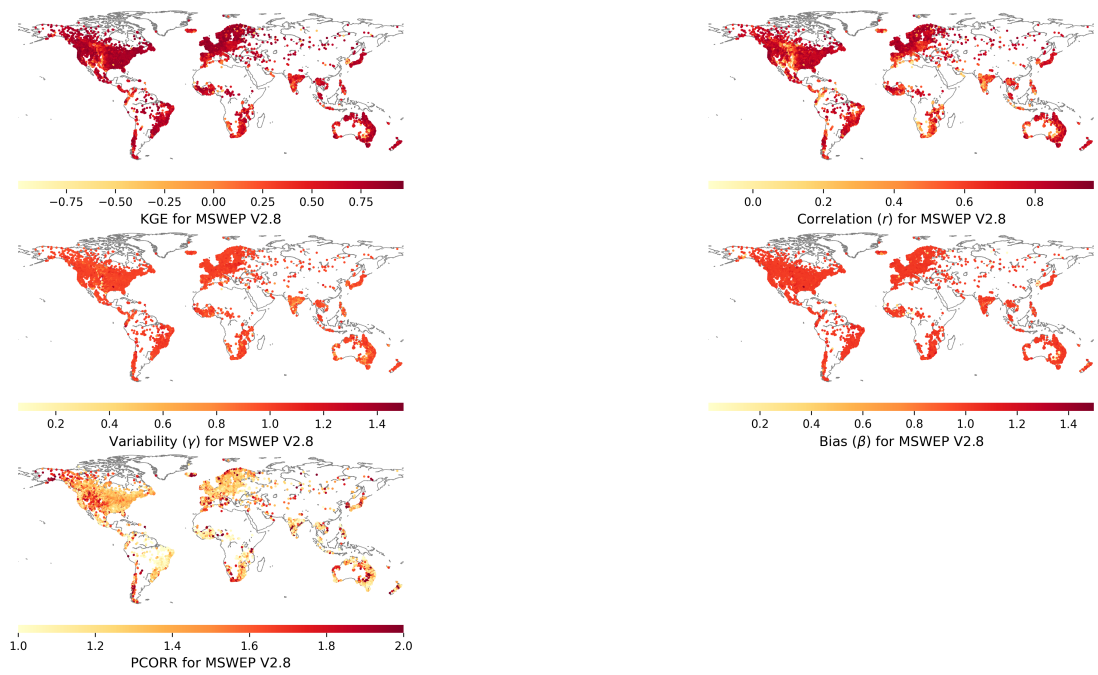

Figure S18: Calibration performance (KGE, correlation, variability, and bias) and PCORR values for MSWEP V2.8.

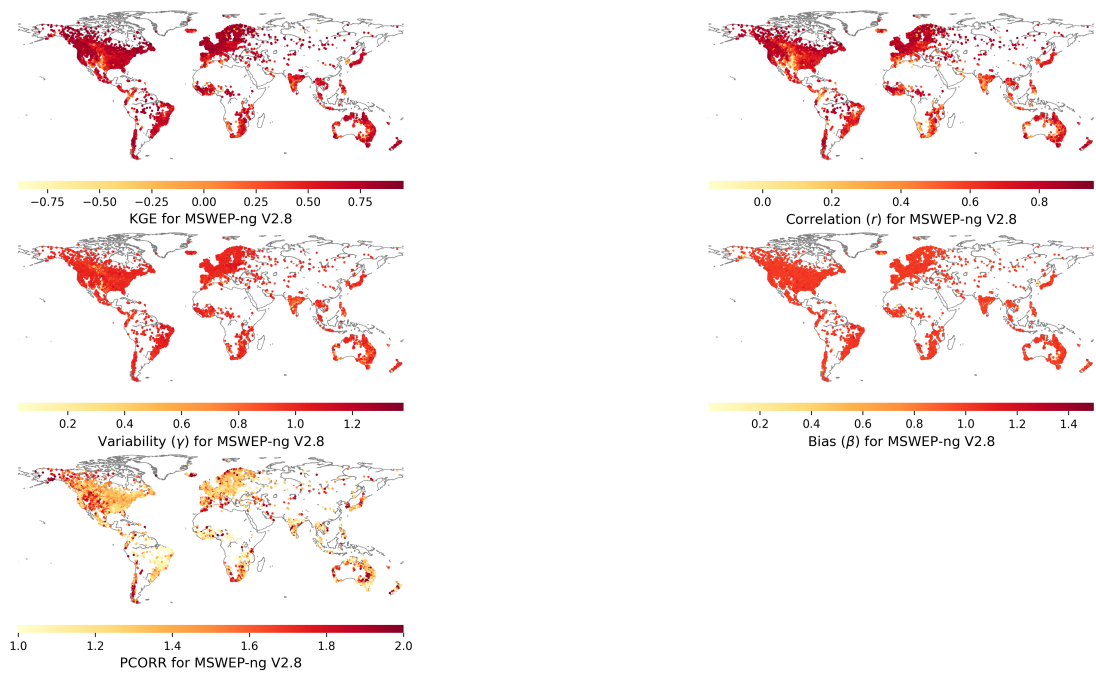

Figure S19: Calibration performance (KGE, correlation, variability, and bias) and PCORR values for MSWEP-ng V2.8 dataset.

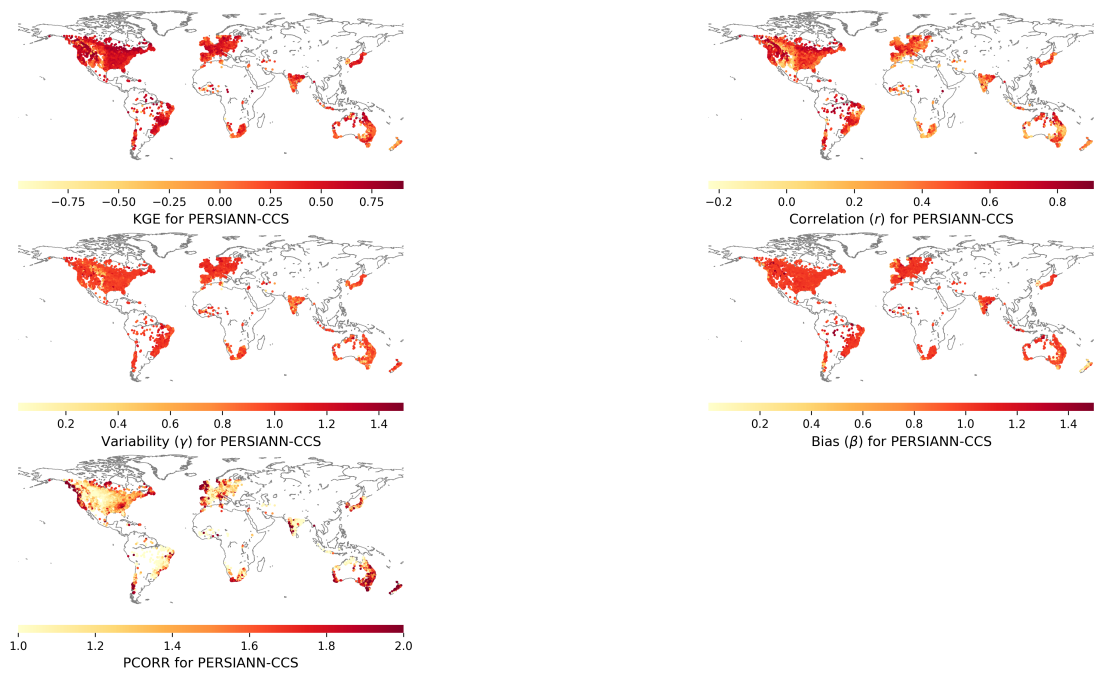

Figure S20: Calibration performance (KGE, correlation, variability, and bias) and PCORR values for PERSIANN-CCS.

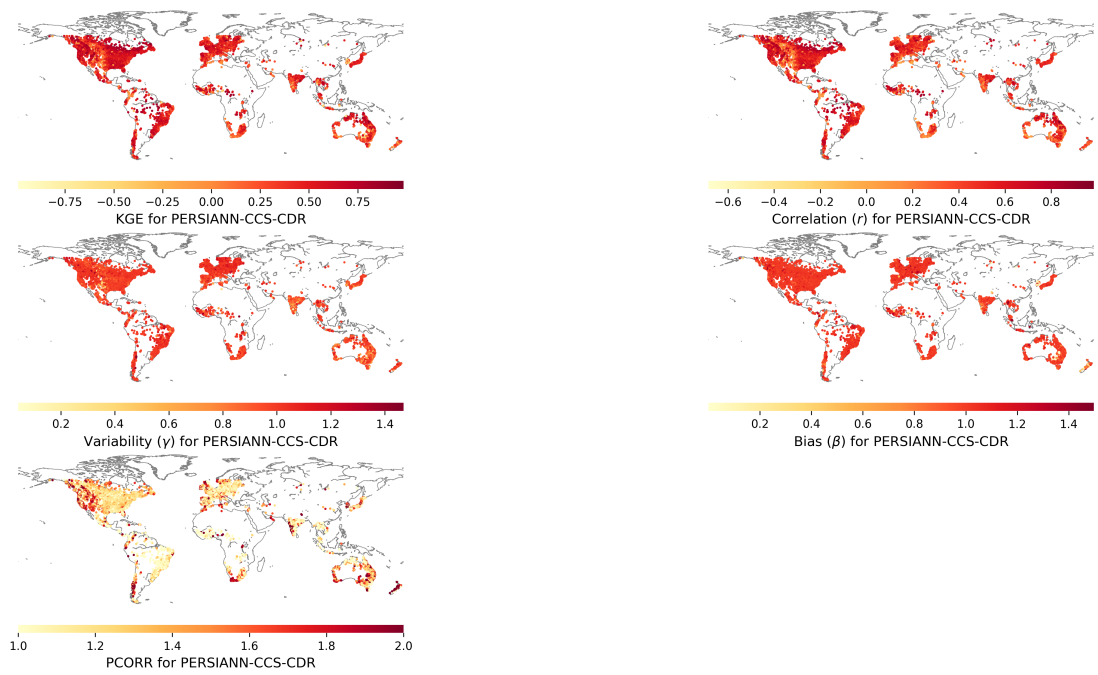

Figure S21: Calibration performance (KGE, correlation, variability, and bias) and PCORR values for PERSIANN-CCS-CDS.

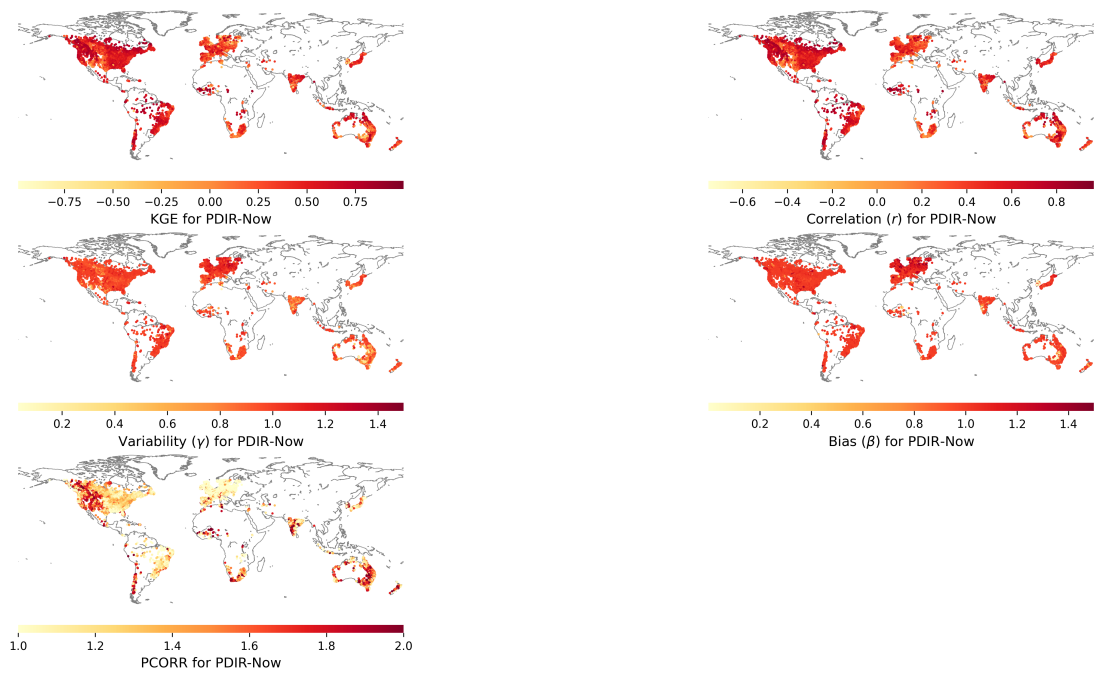

Figure S22: Calibration performance (KGE, correlation, variability, and bias) and PCORR values for PDIR-Now.

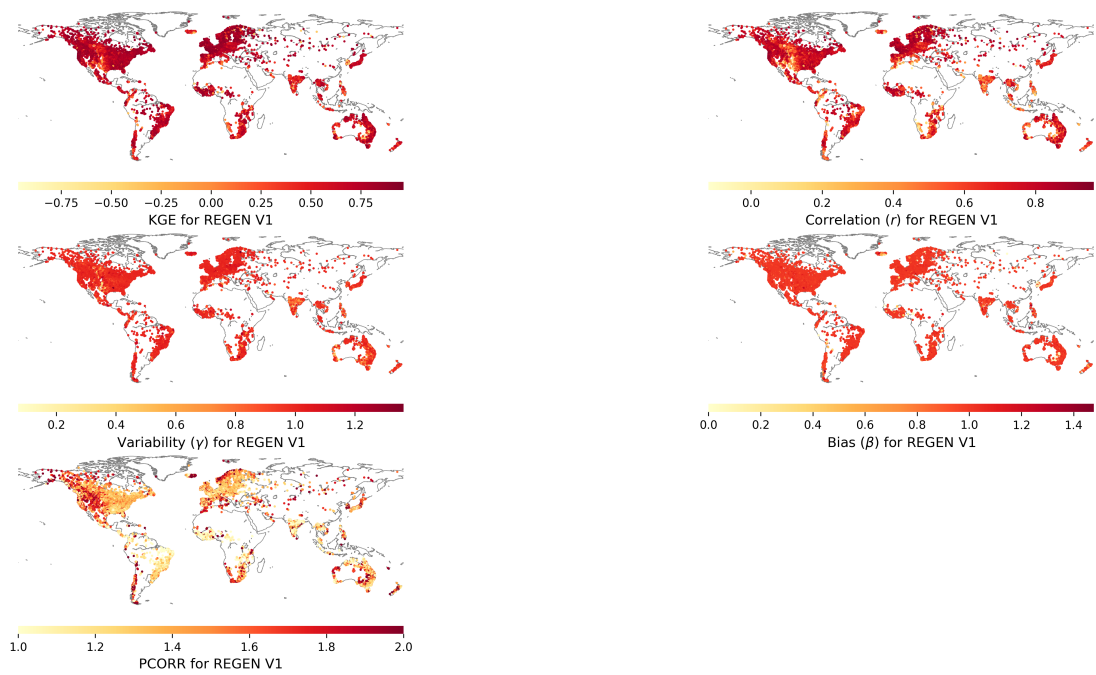

Figure S23: Calibration performance (KGE, correlation, variability, and bias) and PCORR values achieved for GPM+SM2RAIN.

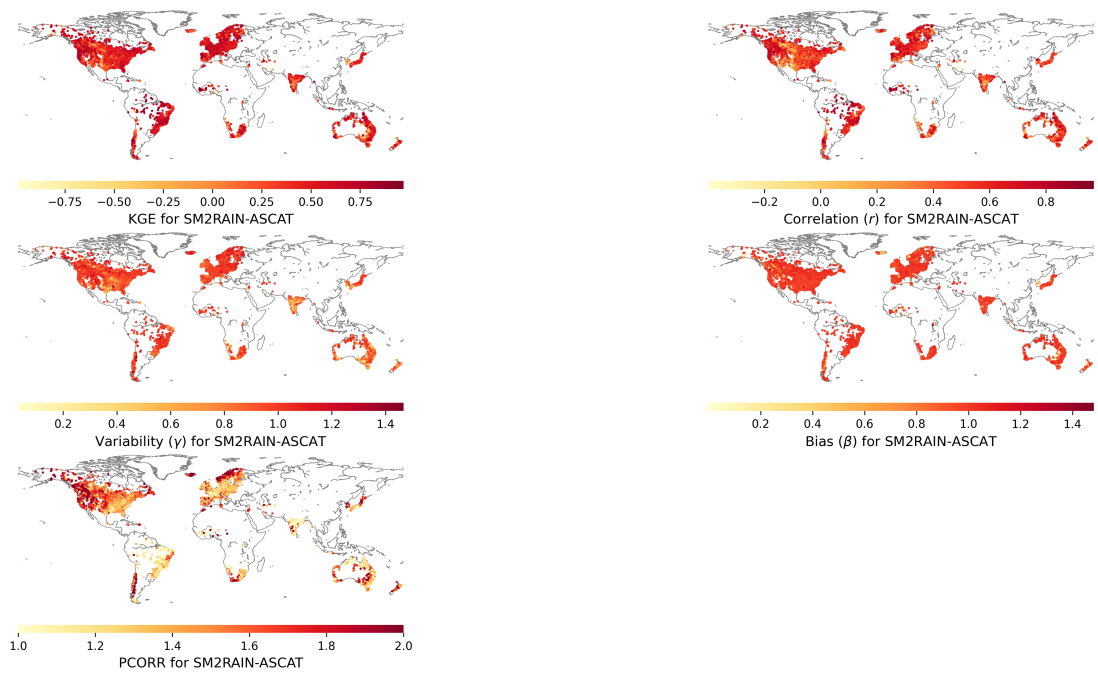

Figure S24: Calibration performance (KGE, correlation, variability, and bias) and PCORR values for SM2RAIN-ASCAT.

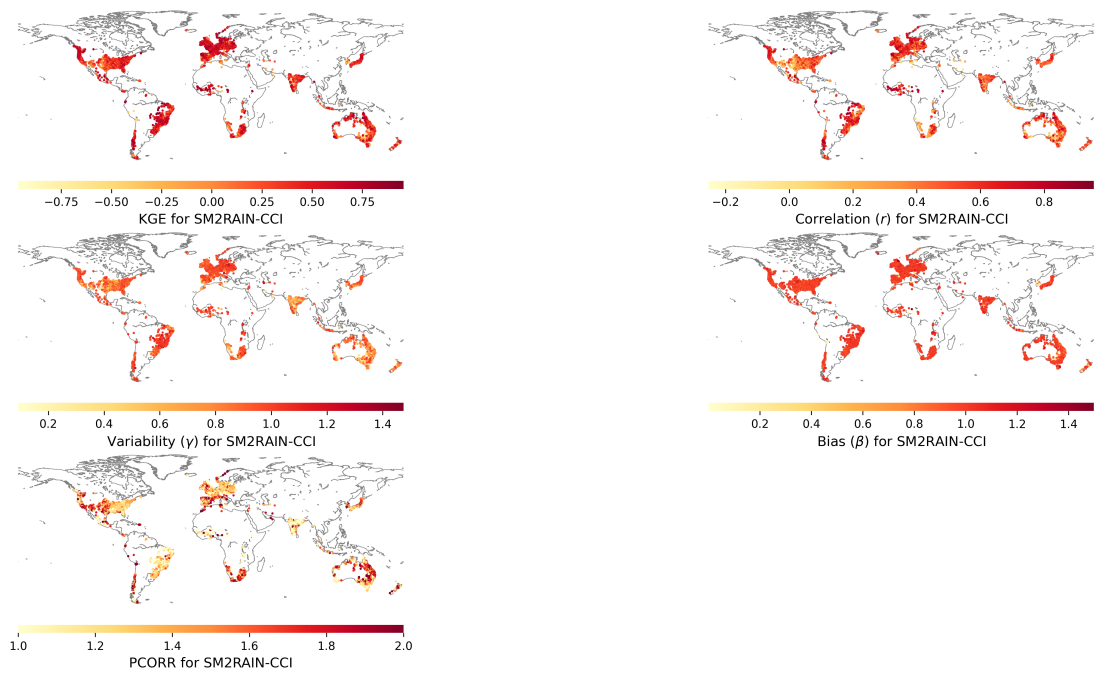

Figure S25: Calibration performance (KGE, correlation, variability, and bias) and PCORR values achieved for SM2RAIN-CCI.

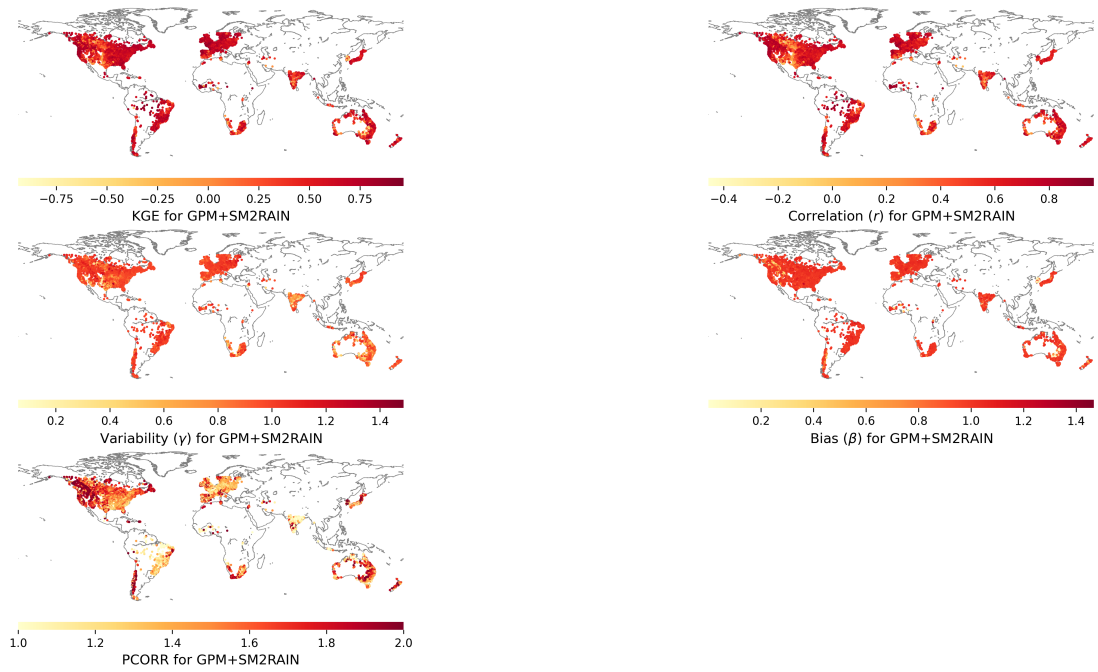

Figure S26: Calibration performance (KGE, correlation, variability, and bias) and PCORR values for GPM+SM2RAIN.

### S3 Performance Variation Across Streamflow Data Sources

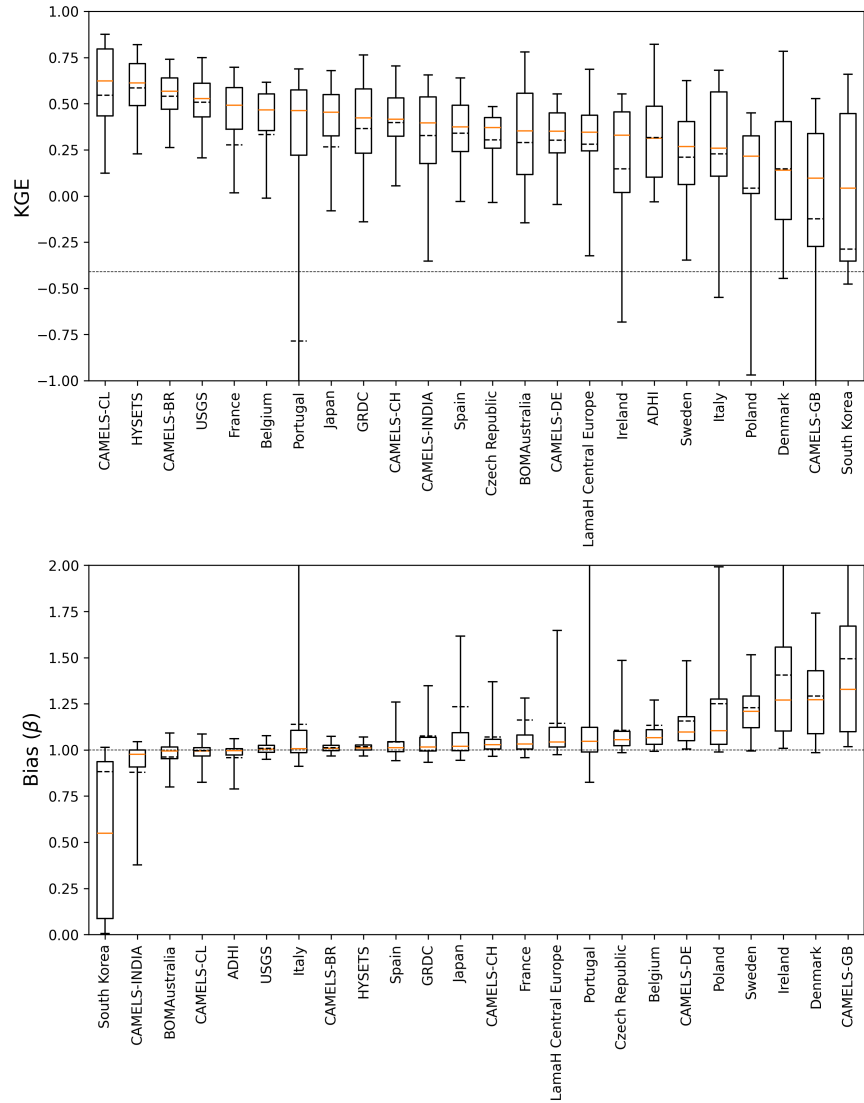

Figure S27: Distribution of calibration KGE and bias for different streamflow data sources for PDIR-Now.

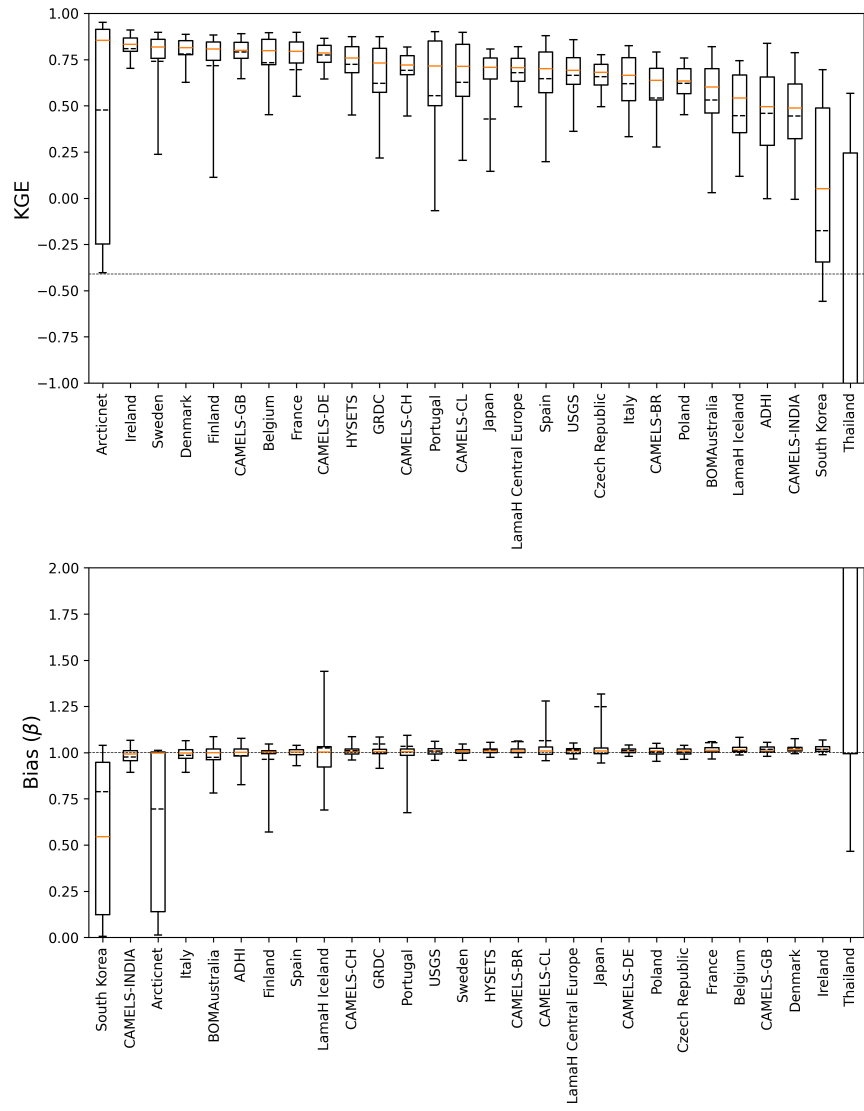

Figure S28: Distribution of calibration KGE and bias for different streamflow data sources for JRA-3Q.

## S4 Impact of Rain Gauge Density on Model Performance

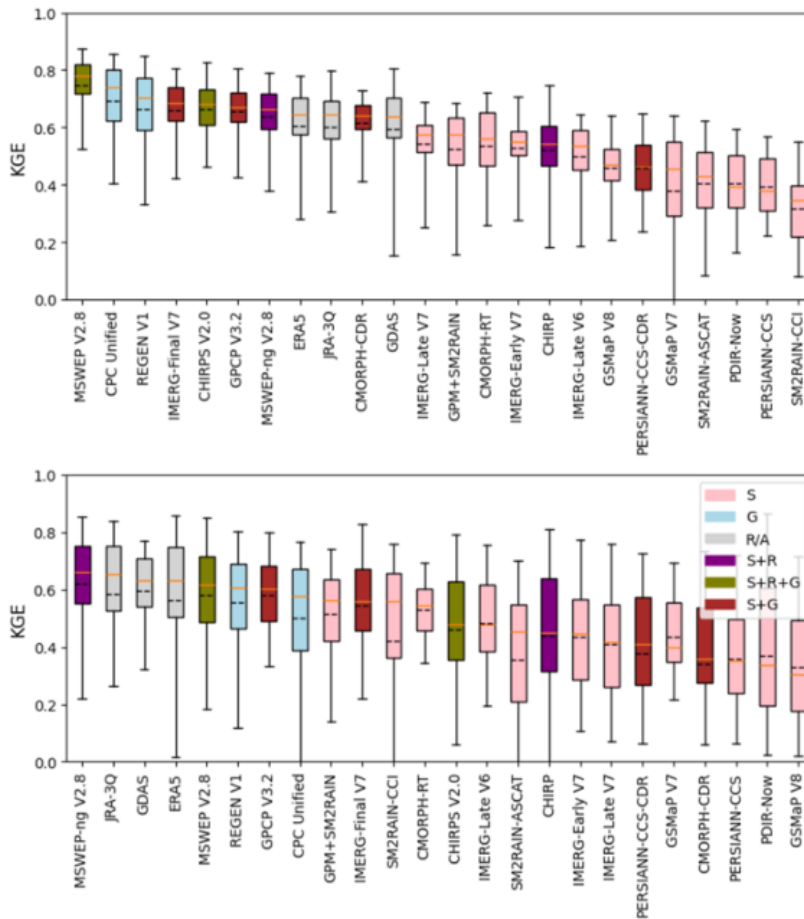

Figure S29: Comparison of  $P$  dataset performance for 100 catchments with highest rain gauge densities (top) vs 100 catchments with lowest rain gauge densities (bottom)

## S5 Scenario Analysis of Calibration Strategies

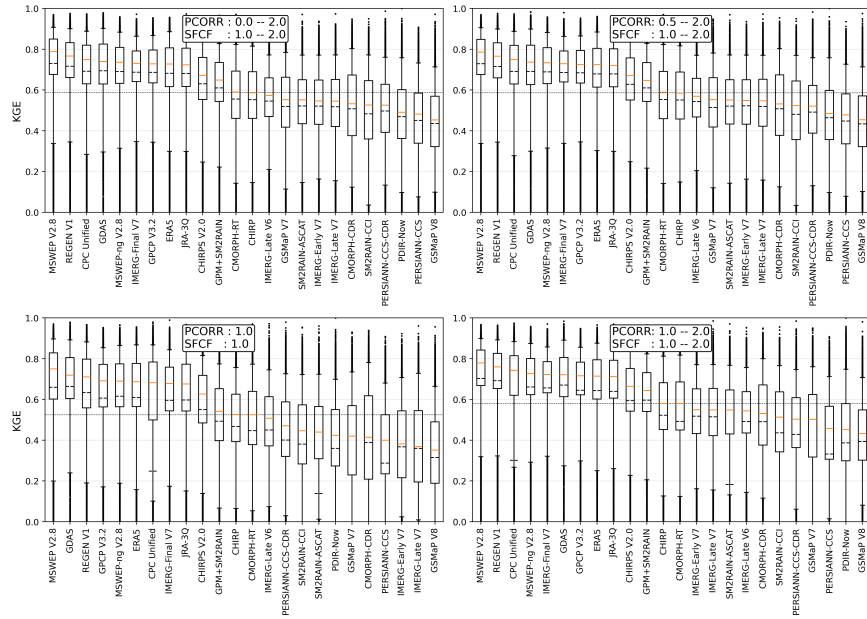

Figure S30: Kling-Gupta Efficiency values for  $P$  datasets in different scenarios of PCORR and SFCF calibration.

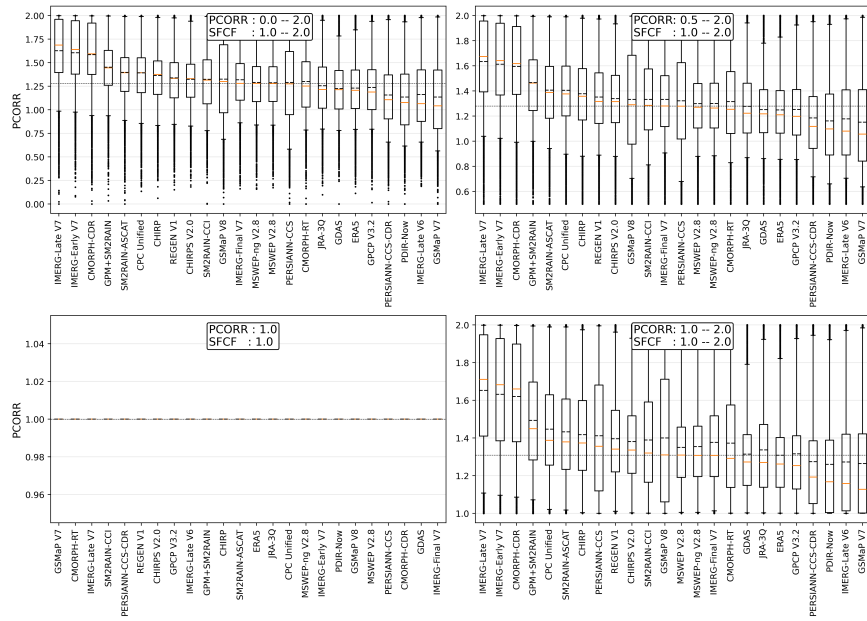

Figure S31: Comparison of distribution of calibrated PCORR values from four calibration scenarios.

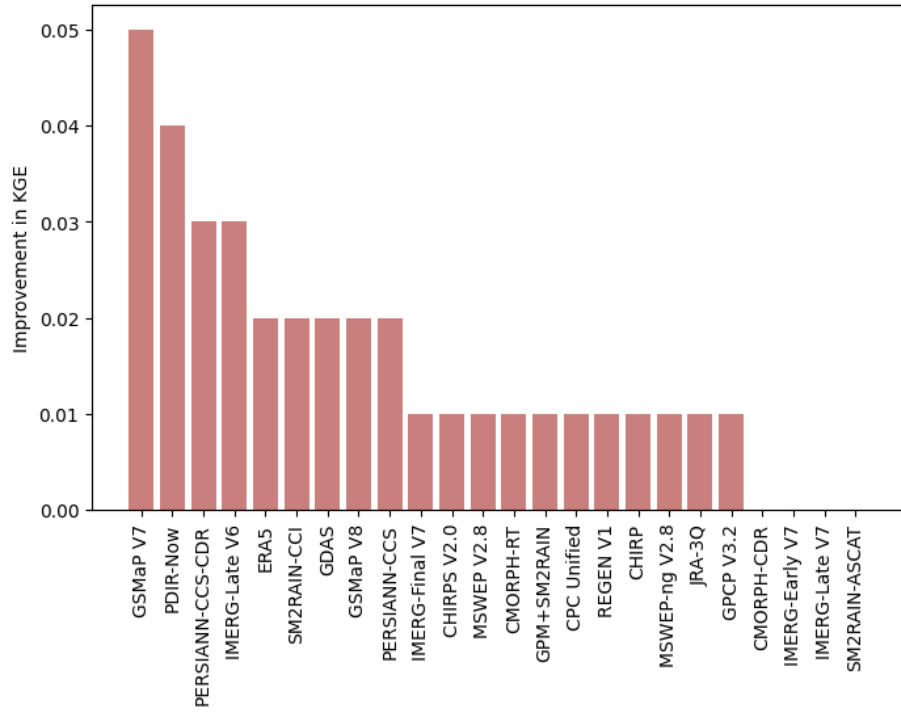

Figure S32: Improvement in KGE values for different P datasets by increasing the range of PCORR from 1.0-2.0 to 0.0 to 2.0 during calibration.

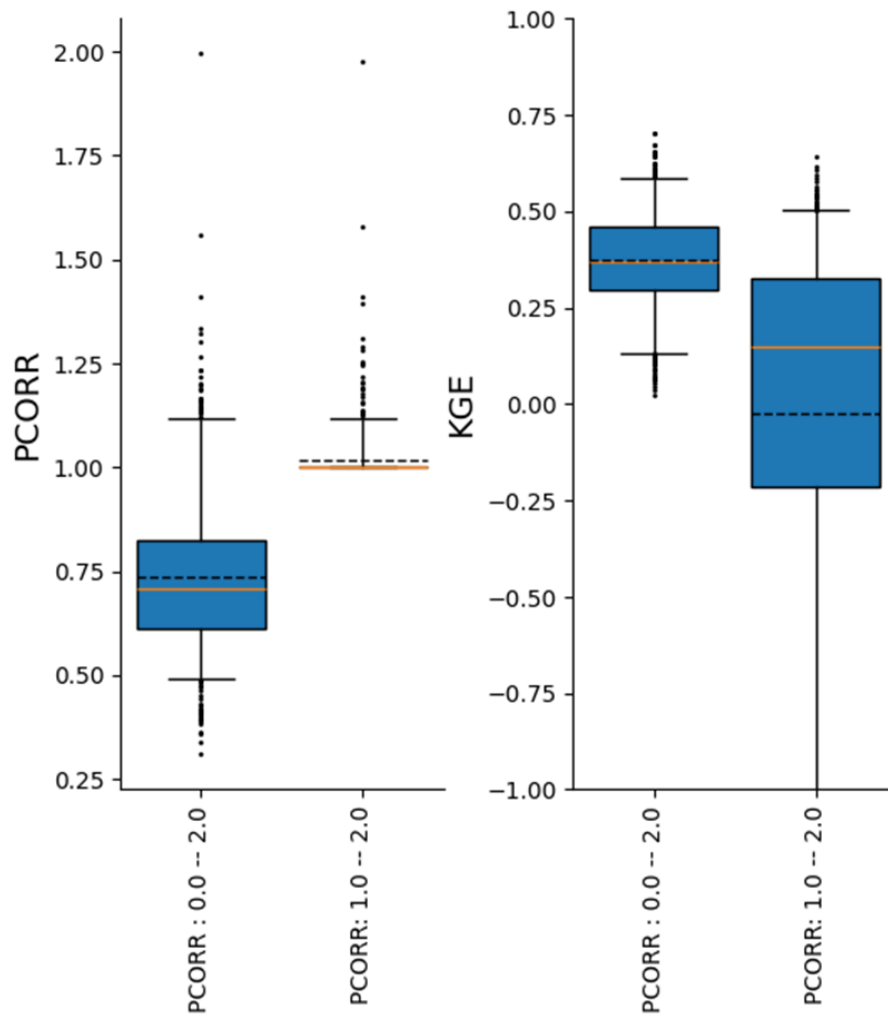

Figure S33: Comparison of calibrated PCORR and corresponding KGE values from 531 catchments from CAMELS-GB using PDIR-Now P dataset.

## S6 Differences in Mean Annual Precipitation

This section includes 24 maps displaying difference between the mean annual  $P$  of each product and the multi-product mean.

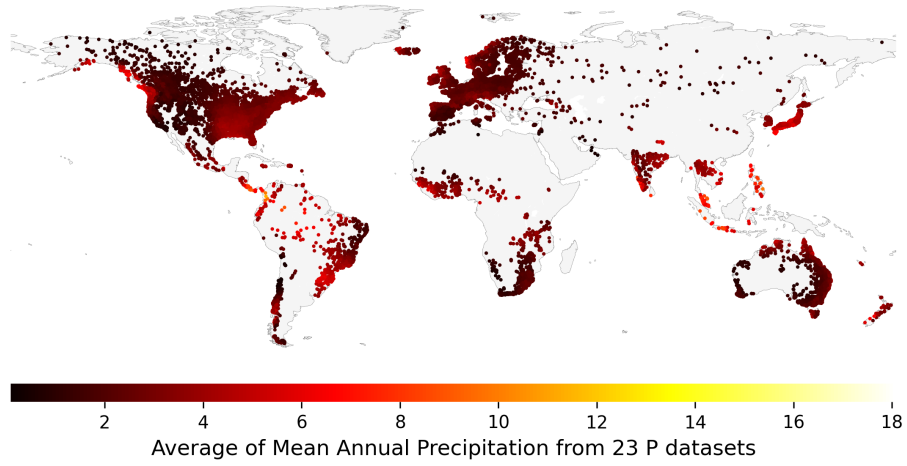

Figure S34: Average of the mean annual precipitation from 24 datasets.

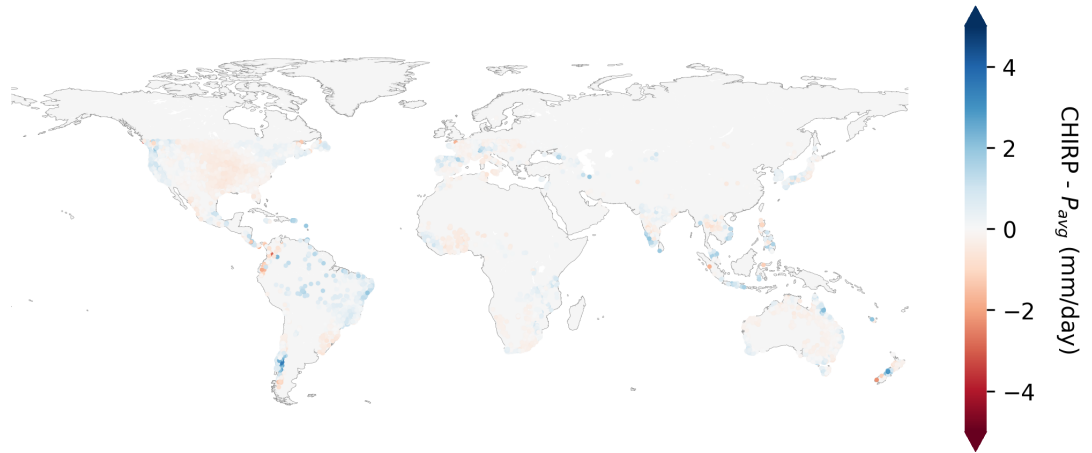

Figure S35: Difference between mean annual precipitation of CHIRP and average of mean annual precipitation of all datasets ( $P_{avg}$ ).

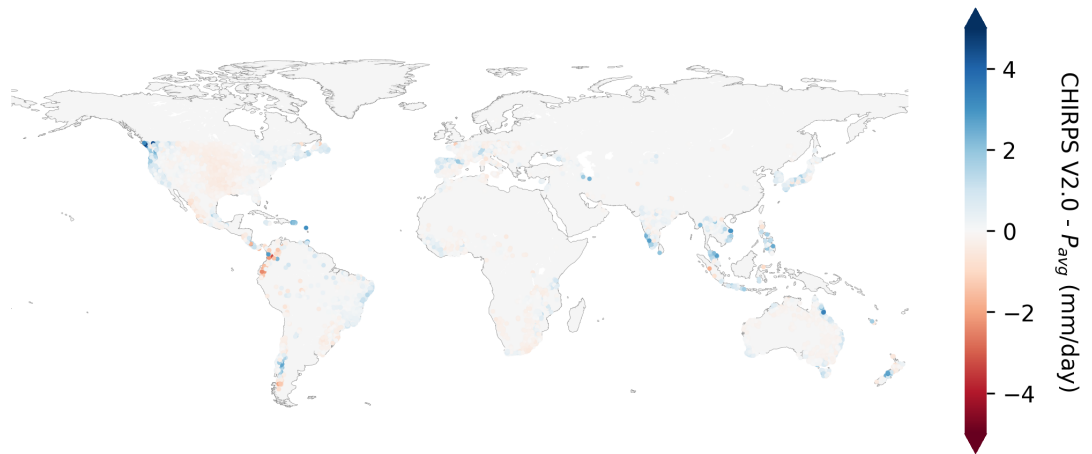

Figure S36: Difference between mean annual precipitation of CHIRPS V2.0 and average of mean annual precipitation of all datasets ( $P_{avg}$ ).

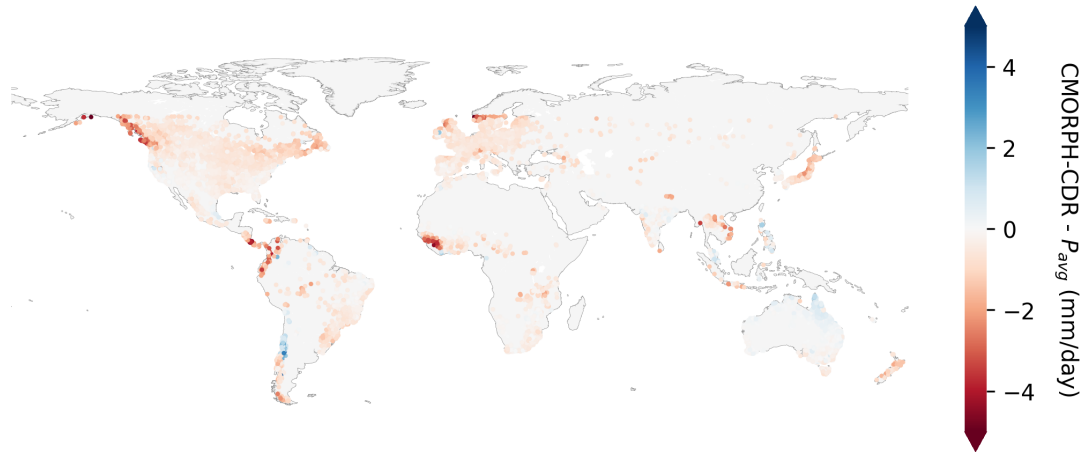

Figure S37: Difference between mean annual precipitation of CMORPH-CDR Unified and average of mean annual precipitation of all datasets ( $P_{avg}$ ).

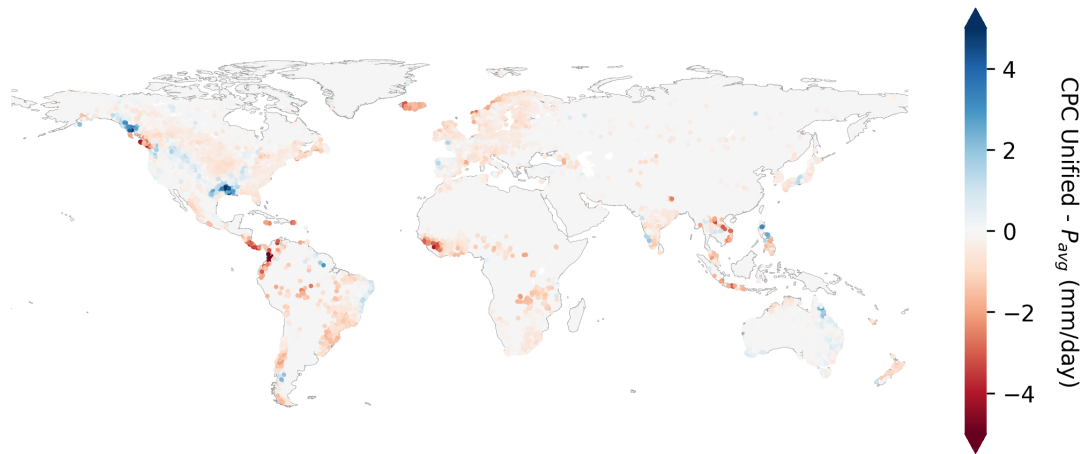

Figure S38: Difference between mean annual precipitation of CPC Unified and average of mean annual precipitation of all datasets ( $P_{avg}$ ).

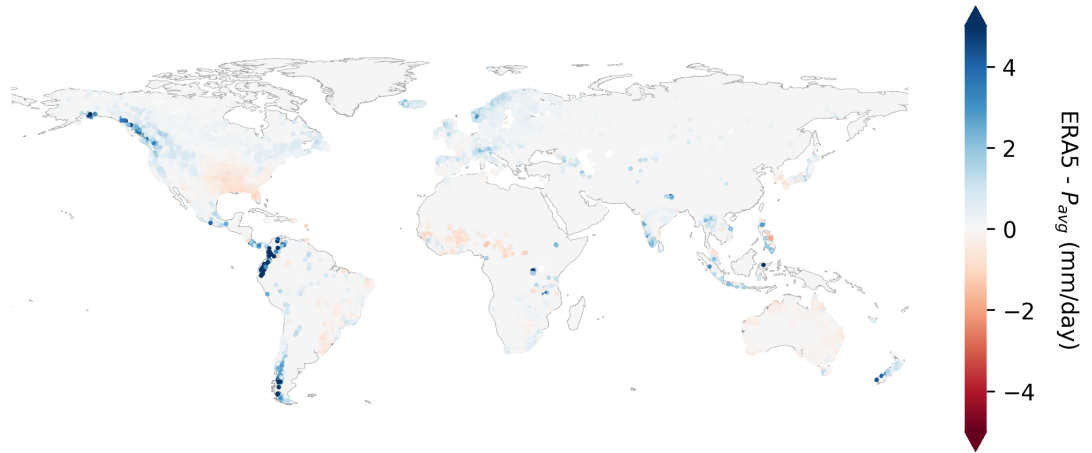

Figure S39: Difference between mean annual precipitation of ERA5 and average of mean annual precipitation of all datasets ( $P_{avg}$ ).

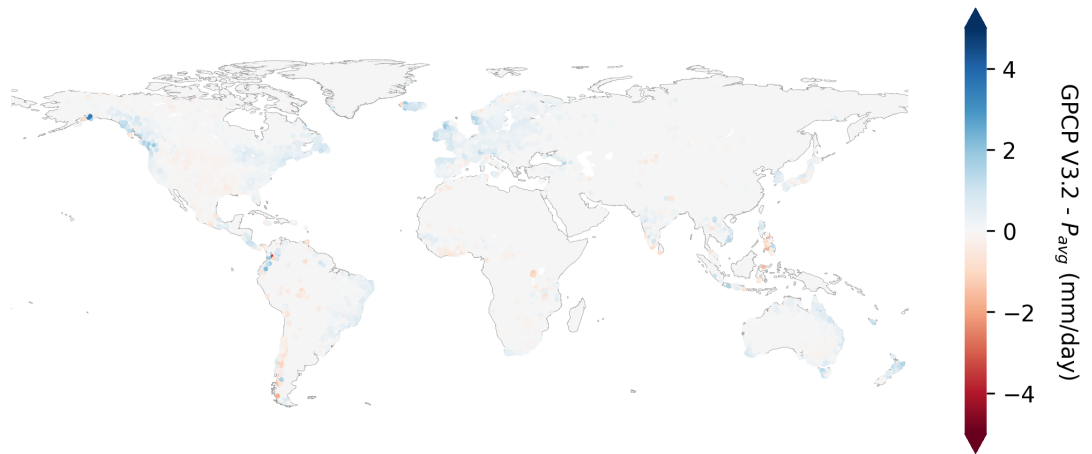

Figure S40: Difference between mean annual precipitation of GPCP V3.2 and average of mean annual precipitation of all datasets ( $P_{avg}$ ).

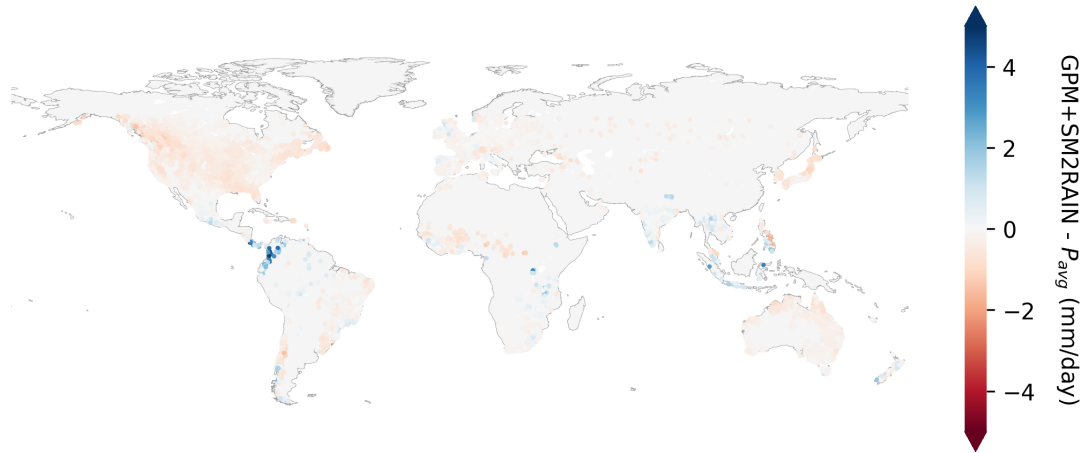

Figure S41: Difference between mean annual precipitation of GPM+SM2RAIN and average of mean annual precipitation of all datasets ( $P_{avg}$ ).

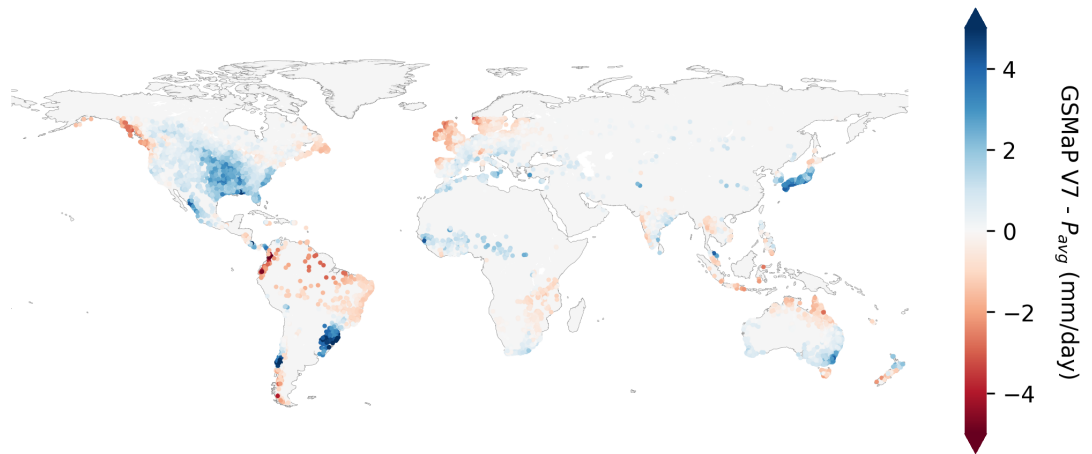

Figure S42: Difference between mean annual precipitation of GSMaP V7 and average of mean annual precipitation of all datasets ( $P_{avg}$ ).

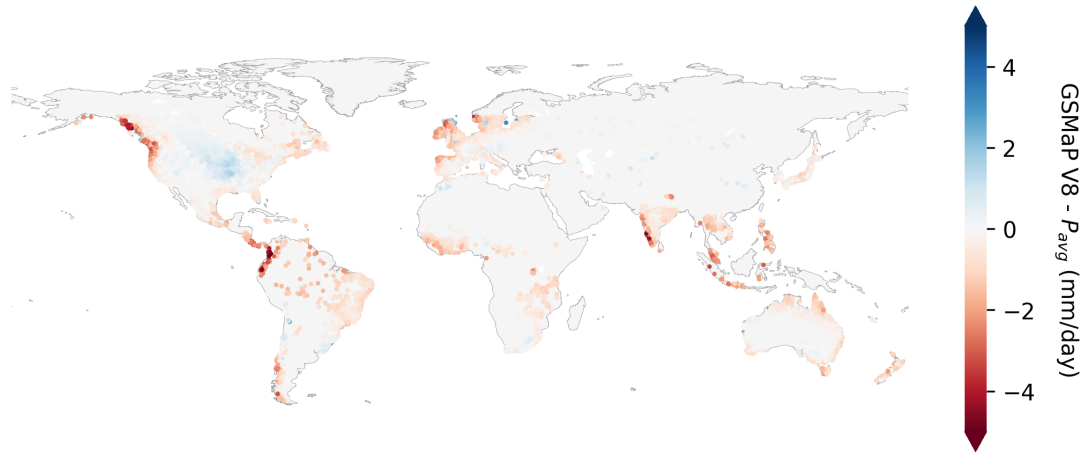

Figure S43: Difference between mean annual precipitation of GSMaP V8 and average of mean annual precipitation of all datasets ( $P_{avg}$ ).

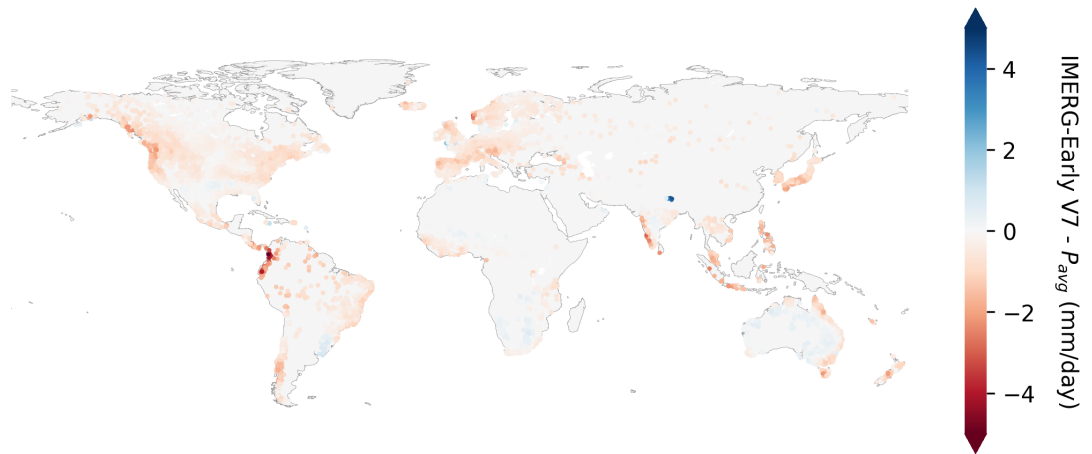

Figure S44: Difference between mean annual precipitation of IMERG-Early V7 and average of mean annual precipitation of all datasets ( $P_{avg}$ ).

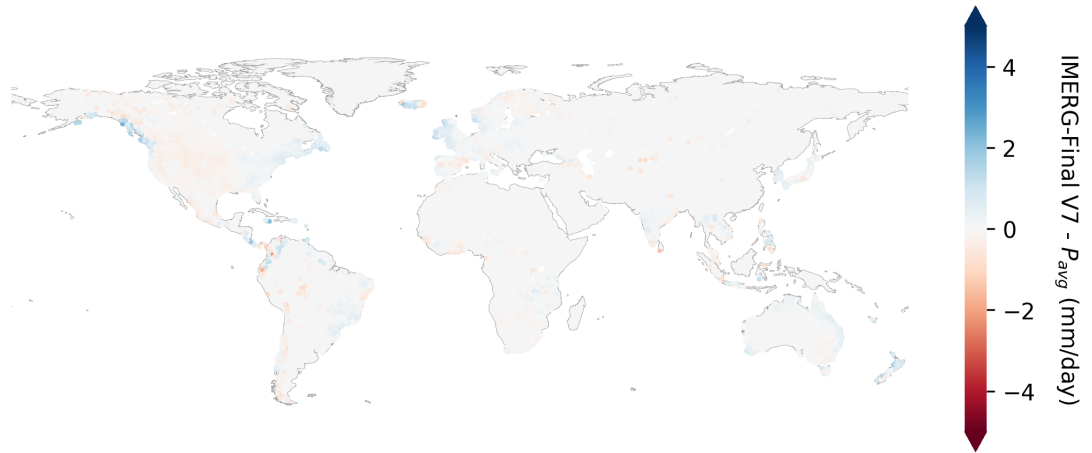

Figure S45: Difference between mean annual precipitation of IMERG-Final V7 and average of mean annual precipitation of all datasets ( $P_{avg}$ ).

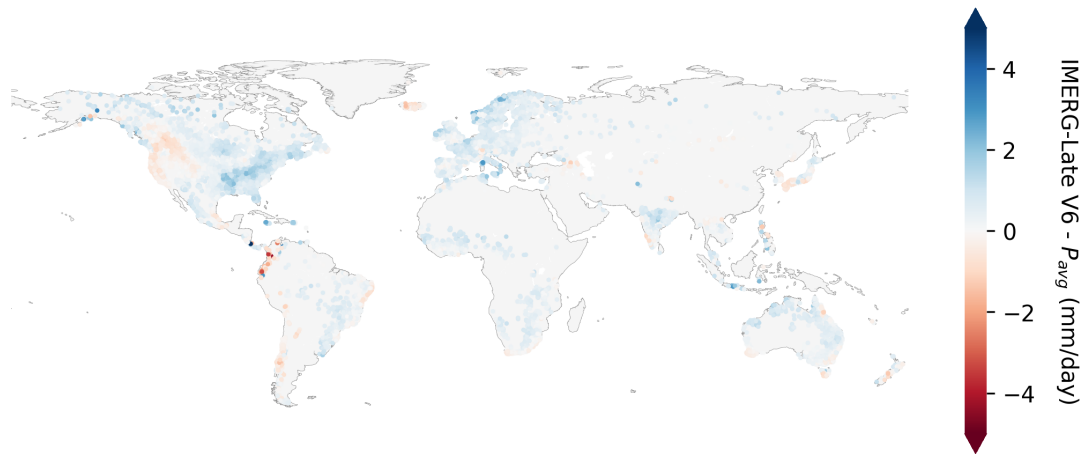

Figure S46: Difference between mean annual precipitation of IMERG-Late V6 and average of mean annual precipitation of all datasets ( $P_{avg}$ ).

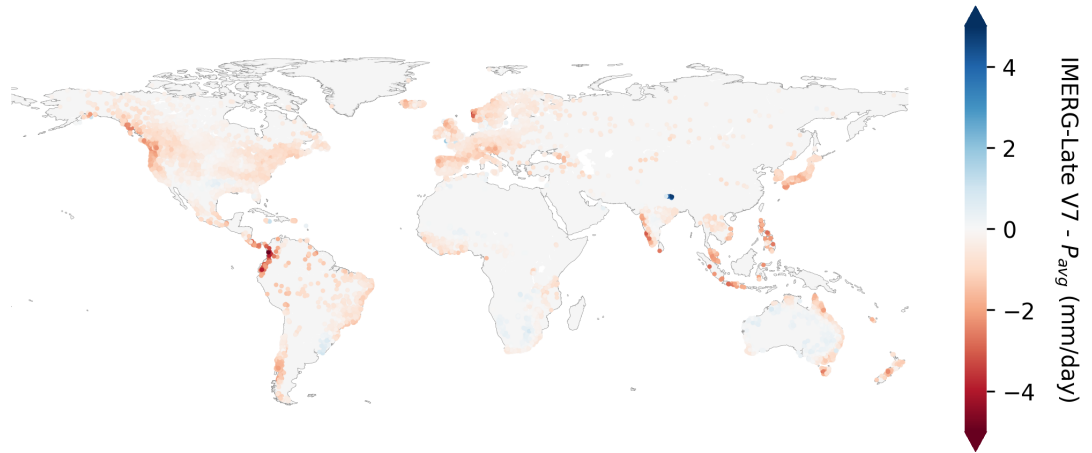

Figure S47: Difference between mean annual precipitation of IMERG-Late V7 and average of mean annual precipitation of all datasets ( $P_{avg}$ ).

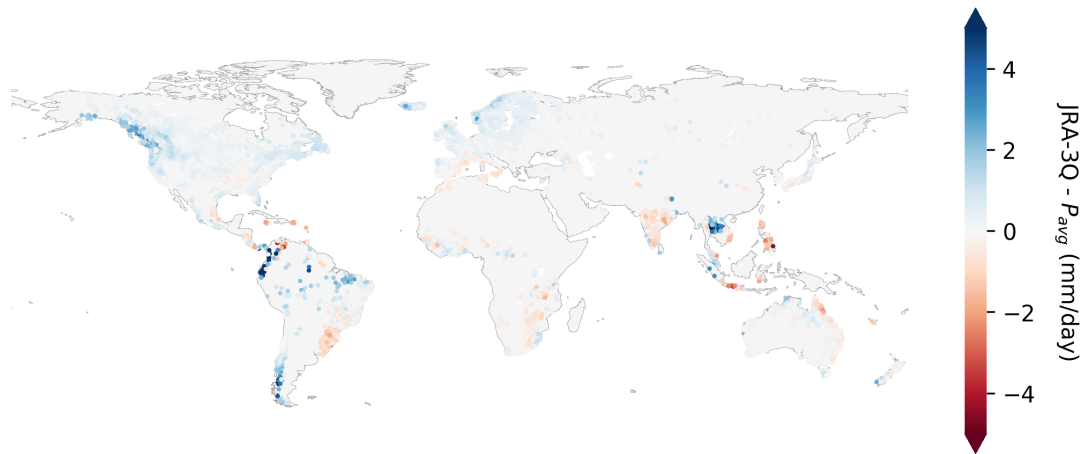

Figure S48: Difference between mean annual precipitation of JRA-3Q and average of mean annual precipitation of all datasets ( $P_{avg}$ ).

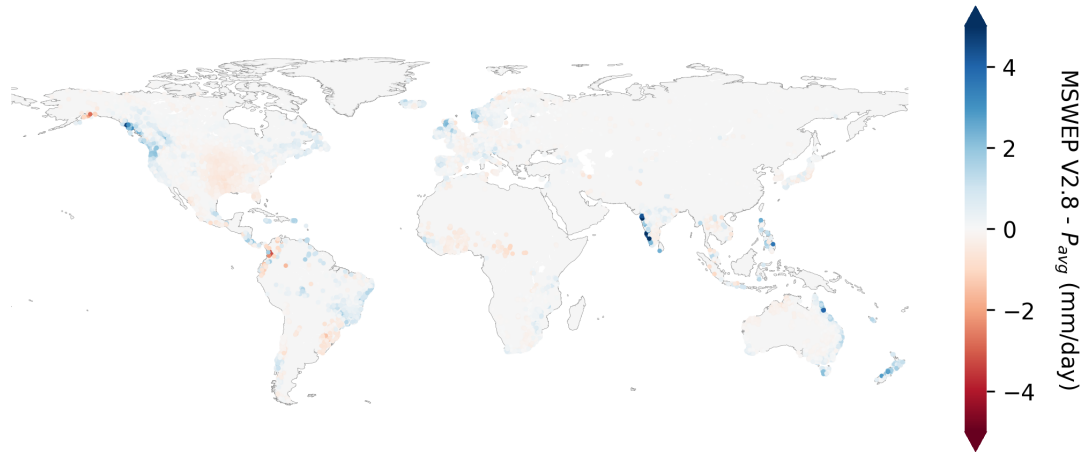

Figure S49: Difference between mean annual precipitation of MSWEP V2.8 and average of mean annual precipitation of all datasets ( $P_{avg}$ ).

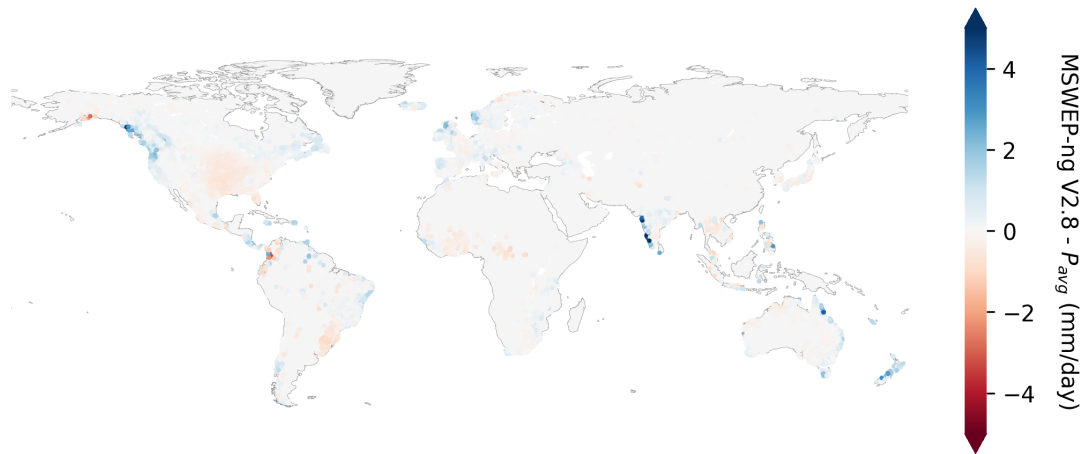

Figure S50: Difference between mean annual precipitation of MSWEP-ng V2.8 and average of mean annual precipitation of all datasets ( $P_{avg}$ ).

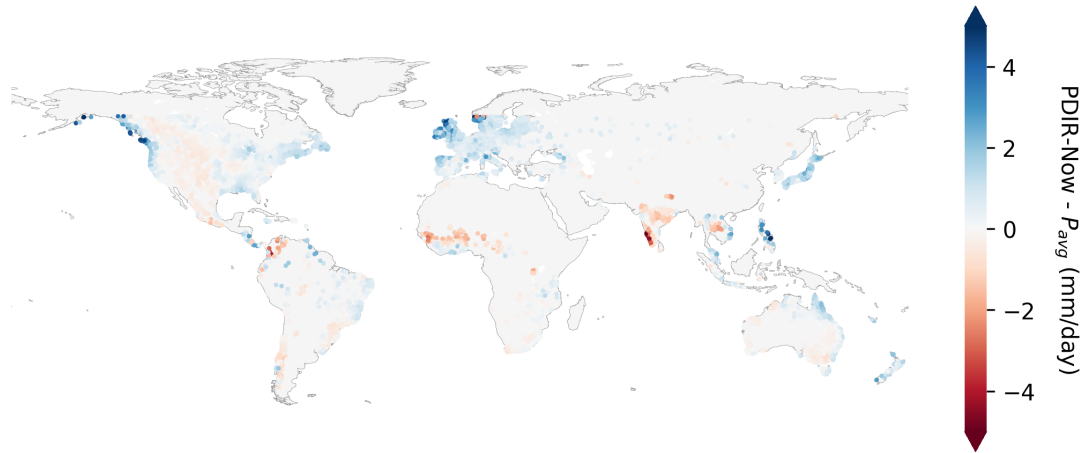

Figure S51: Difference between mean annual precipitation of PDIR-Now and average of mean annual precipitation of all datasets ( $P_{avg}$ ).

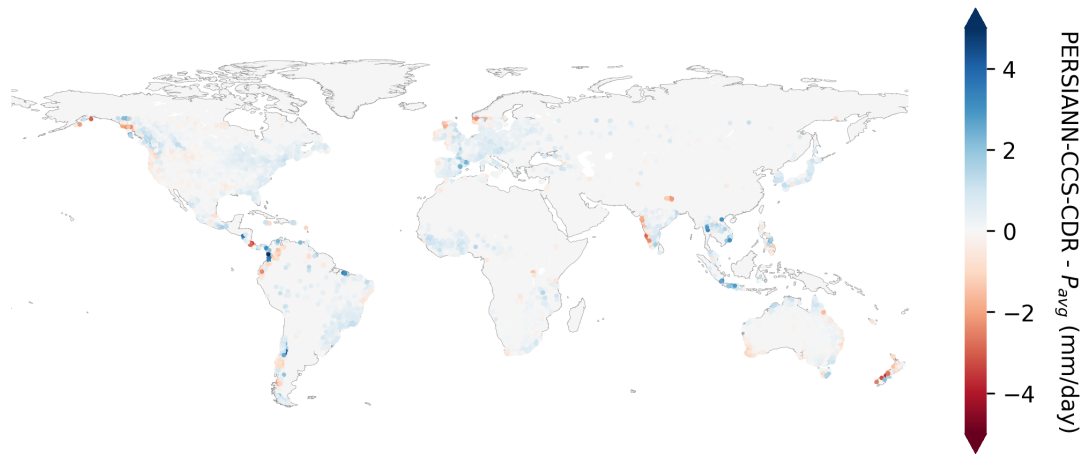

Figure S52: Difference between mean annual precipitation of PERSIANN-CCS-CDR and average of mean annual precipitation of all datasets ( $P_{avg}$ ).

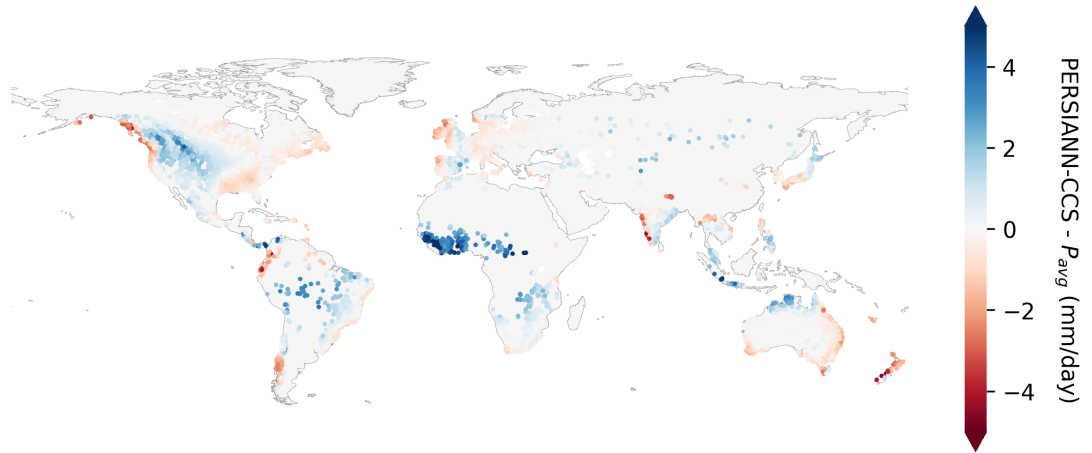

Figure S53: Difference between mean annual precipitation of PERSIANN-CCS and average of mean annual precipitation of all datasets ( $P_{avg}$ ).

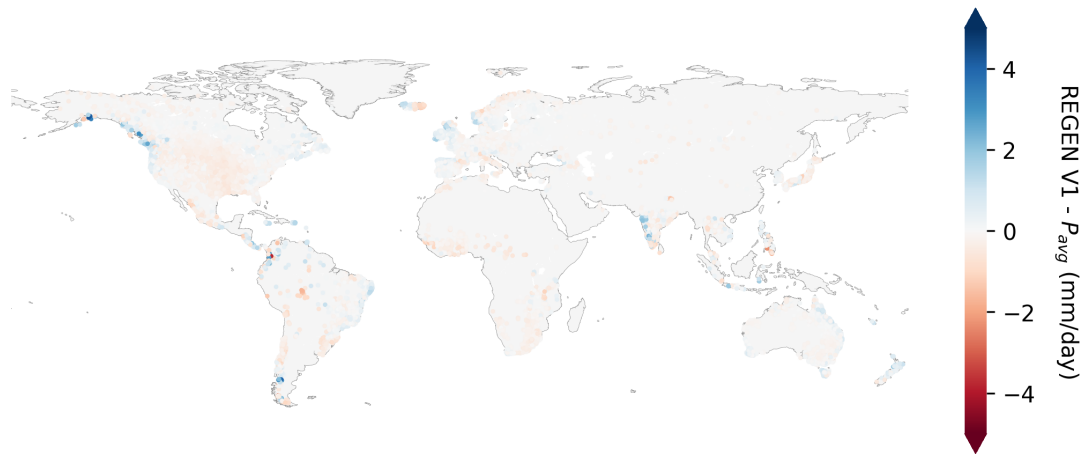

Figure S54: Difference between mean annual precipitation of PERSIANN-CCS and average of mean annual precipitation of all datasets ( $P_{avg}$ ).

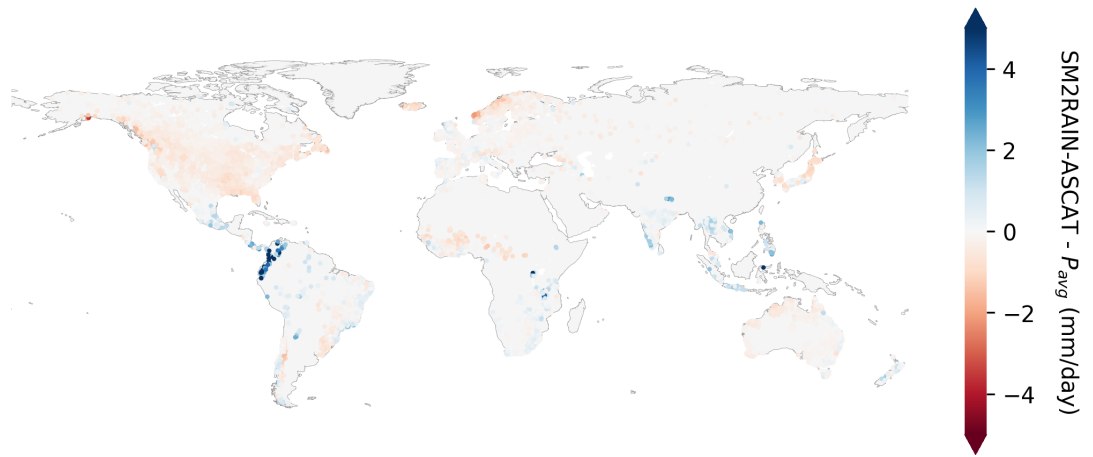

Figure S55: Difference between mean annual precipitation of SM2RAIN-ASCAT and average of mean annual precipitation of all datasets ( $P_{avg}$ ).

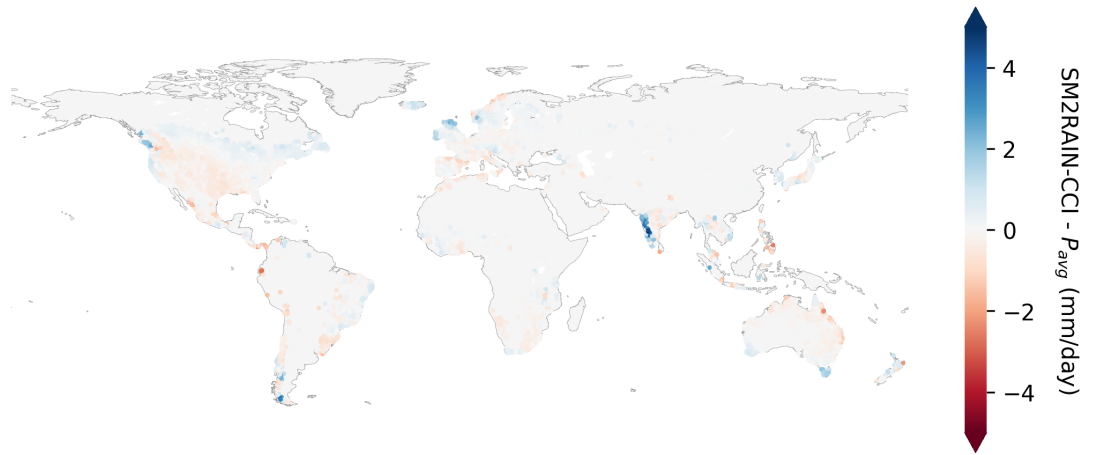

Figure S56: Difference between mean annual precipitation of SM2RAIN-CCI and average of mean annual precipitation of all datasets ( $P_{avg}$ ).

## S7 Performance Variation with Altitude

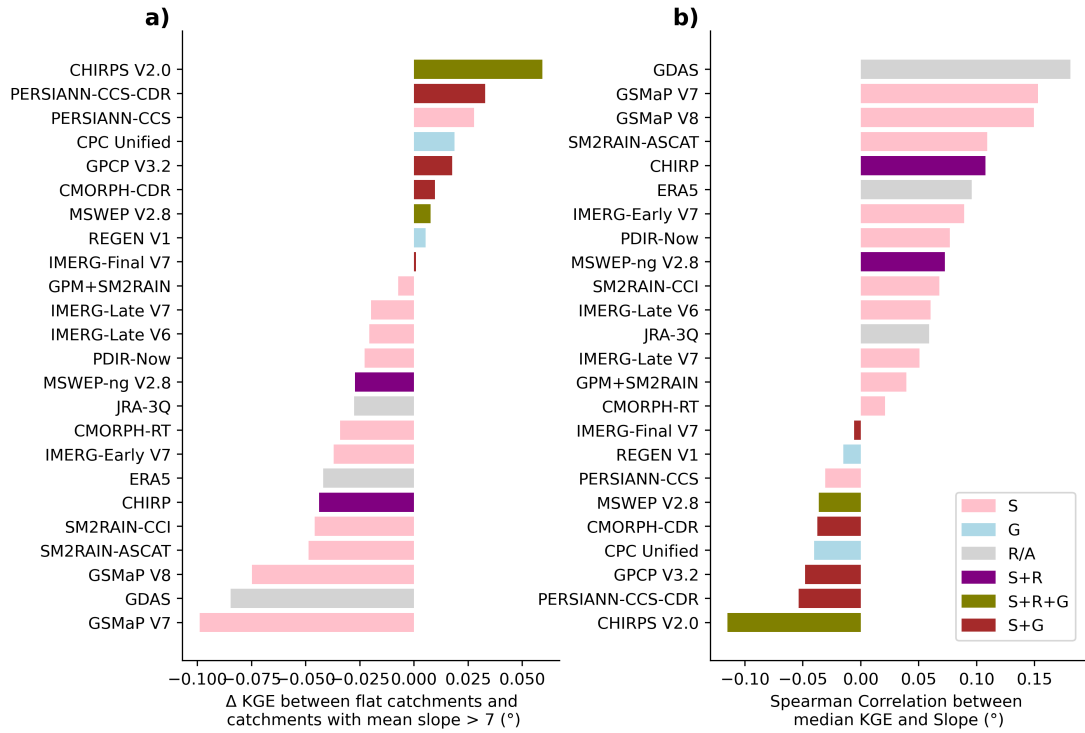

Figure S57: Variation in HBV performance (KGE) with increase in slope.
